# Supplementary material for: Cryo-electron microscopy structure of an archaeal ribonuclease P holoenzyme
Source: PubMed Central journal article supplement (PMC6565675; doi:10.1038/s41467-019-10496-3), 2019-06-13
Supplement: 41467_2019_10496_MOESM1_ESM.pdf [file 41467_2019_10496_MOESM1_ESM.pdf]

**Supplementary Information**

**Cryo-electron microscopy structure of an archaeal  
ribonuclease P holoenzyme**

Wan et al.

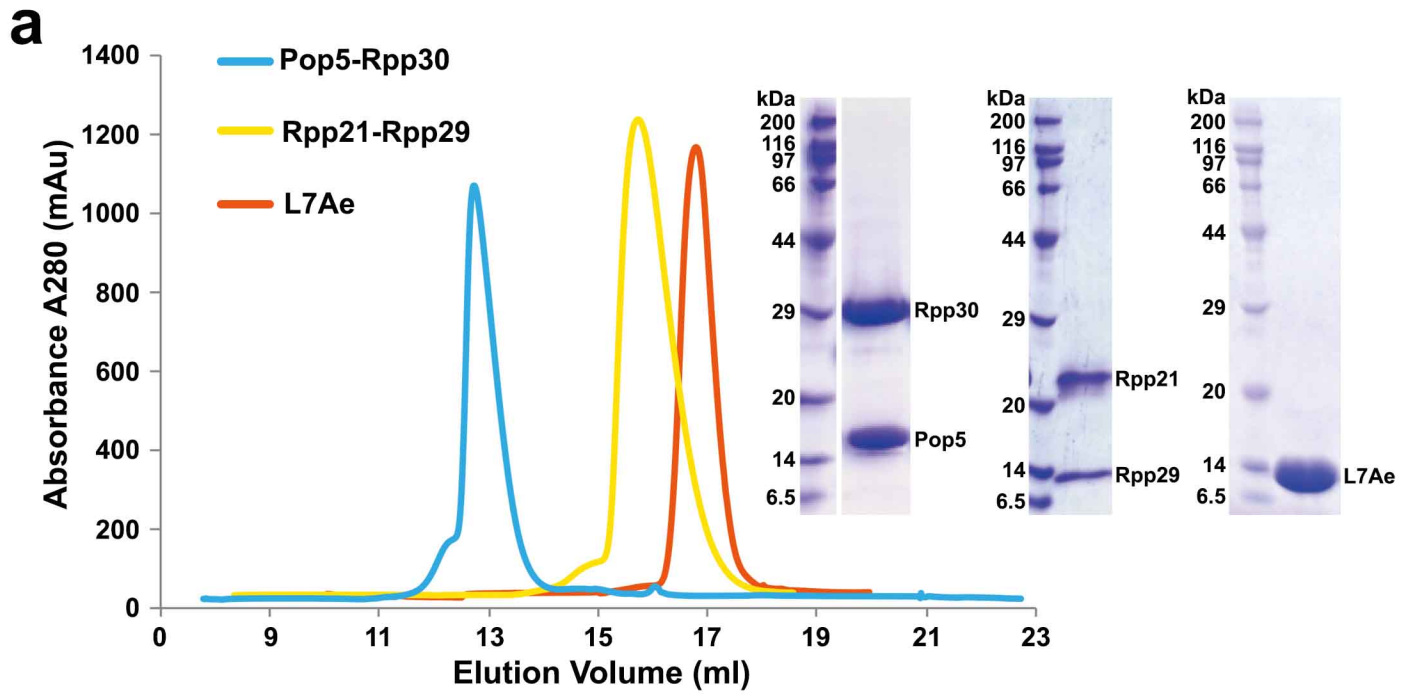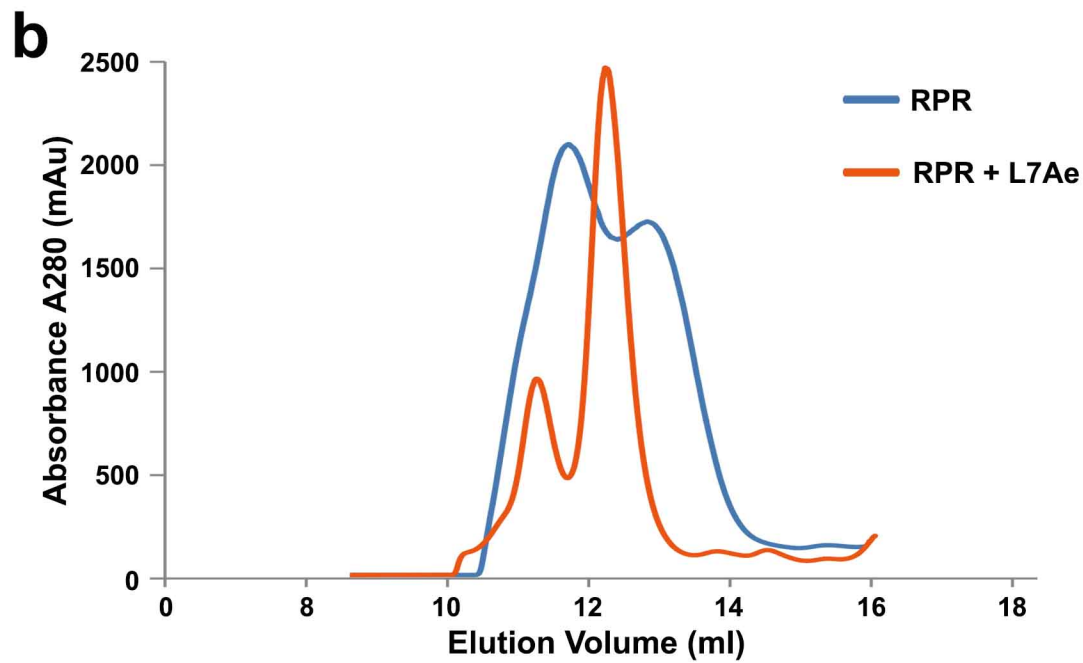

**Supplementary Figure 1**

**Supplementary Fig. 1** Protein purification and RPR transcription. **(a)** SEC profiles of L7Ae, the (Pop5-Rpp30)<sub>2</sub> and Rpp29-Rpp21 subcomplexes. Coomassie-stained SDS-PAGE gels of the corresponding peaks in the profiles are also shown. **(b)** SEC profiles of *in vitro* transcribed RPR with or without L7Ae.

**a**

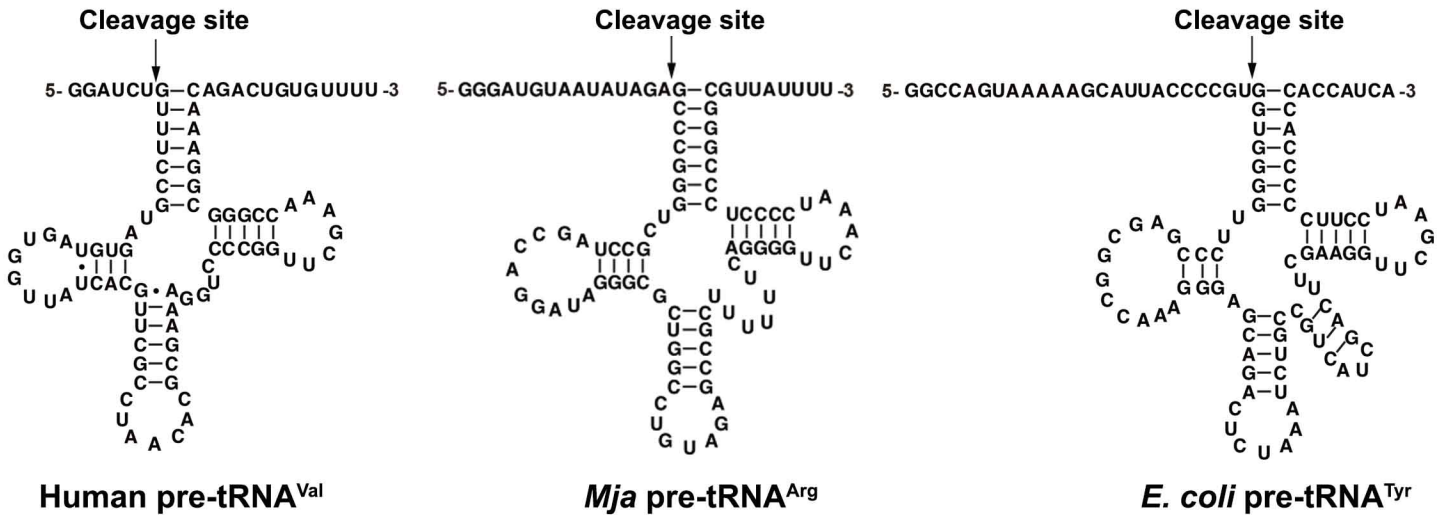

**b**

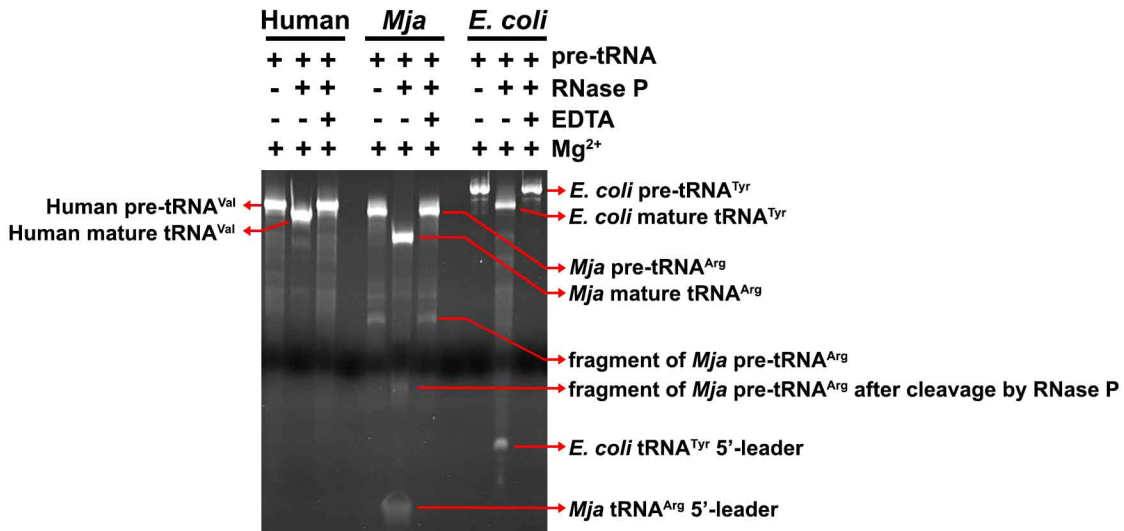

**Supplementary Figure 2**



**Supplementary Fig. 2** tRNA processing activity assay. **(a)** Secondary structures of human pre-tRNA<sup>Val</sup> (left), *M. jannaschii* pre-tRNA<sup>Arg</sup> (middle) and *E. coli* pre-tRNA<sup>Tyr</sup> (right). **(b)** *In vitro* tRNA processing assay of the *Mja*RNase P holoenzyme with different pre-tRNA substrates shown in (a). Cleaved 5'-leaders of *E. coli* pre-tRNA<sup>Tyr</sup> and *M. jannaschii* pre-tRNA<sup>Arg</sup> are denoted at the bottom of the gel. The cleaved 5'-leader of human pre-tRNA<sup>Val</sup> is too short (six nucleotides) to be seen in the gel. It is likely that during the preparation of pre-tRNA<sup>Arg</sup>, a fragment of pre-tRNA<sup>Arg</sup> that contains the 5'-leader was generated and after cleavage by RNase P, this fragment gave rise to an extra band that is not present without RNase P or with EDTA.

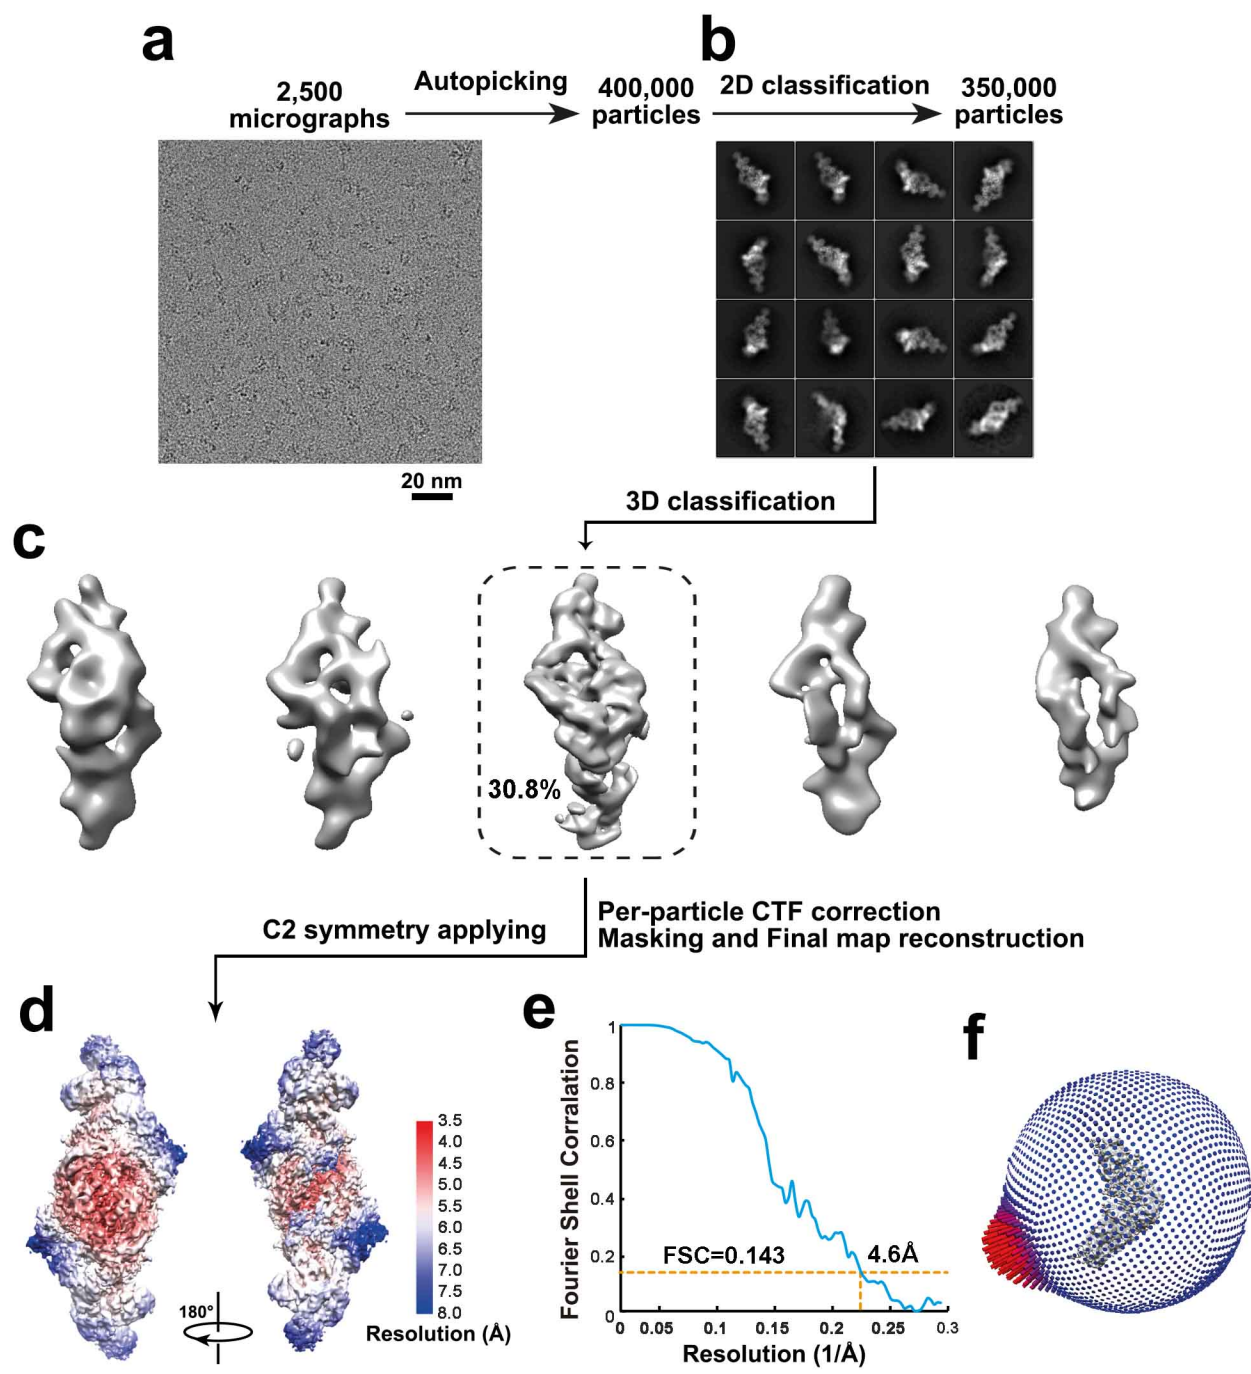

**Supplementary Figure 3**

**Supplementary Fig. 3** Cryo-EM analyses of the *Mja*RNase P holoenzyme. **(a)** A representative cryo-EM micrograph of the *Mja*RNase P holoenzyme. **(b)** Selected reference-free 2D class averages of the *Mja*RNase P particles. **(c)** 3D classes of the cryo-EM particles used for *Mja*RNase P reconstruction. **(d)** Local resolution estimation of the *Mja*RNase P complex. **(e)** Gold standard Fourier shell correlation (FSC) curve of the final reconstructed EM map of the *Mja*RNase P holoenzyme. **(f)** Angular distribution of the particles used for the final reconstruction of the *Mja*RNase P holoenzyme.

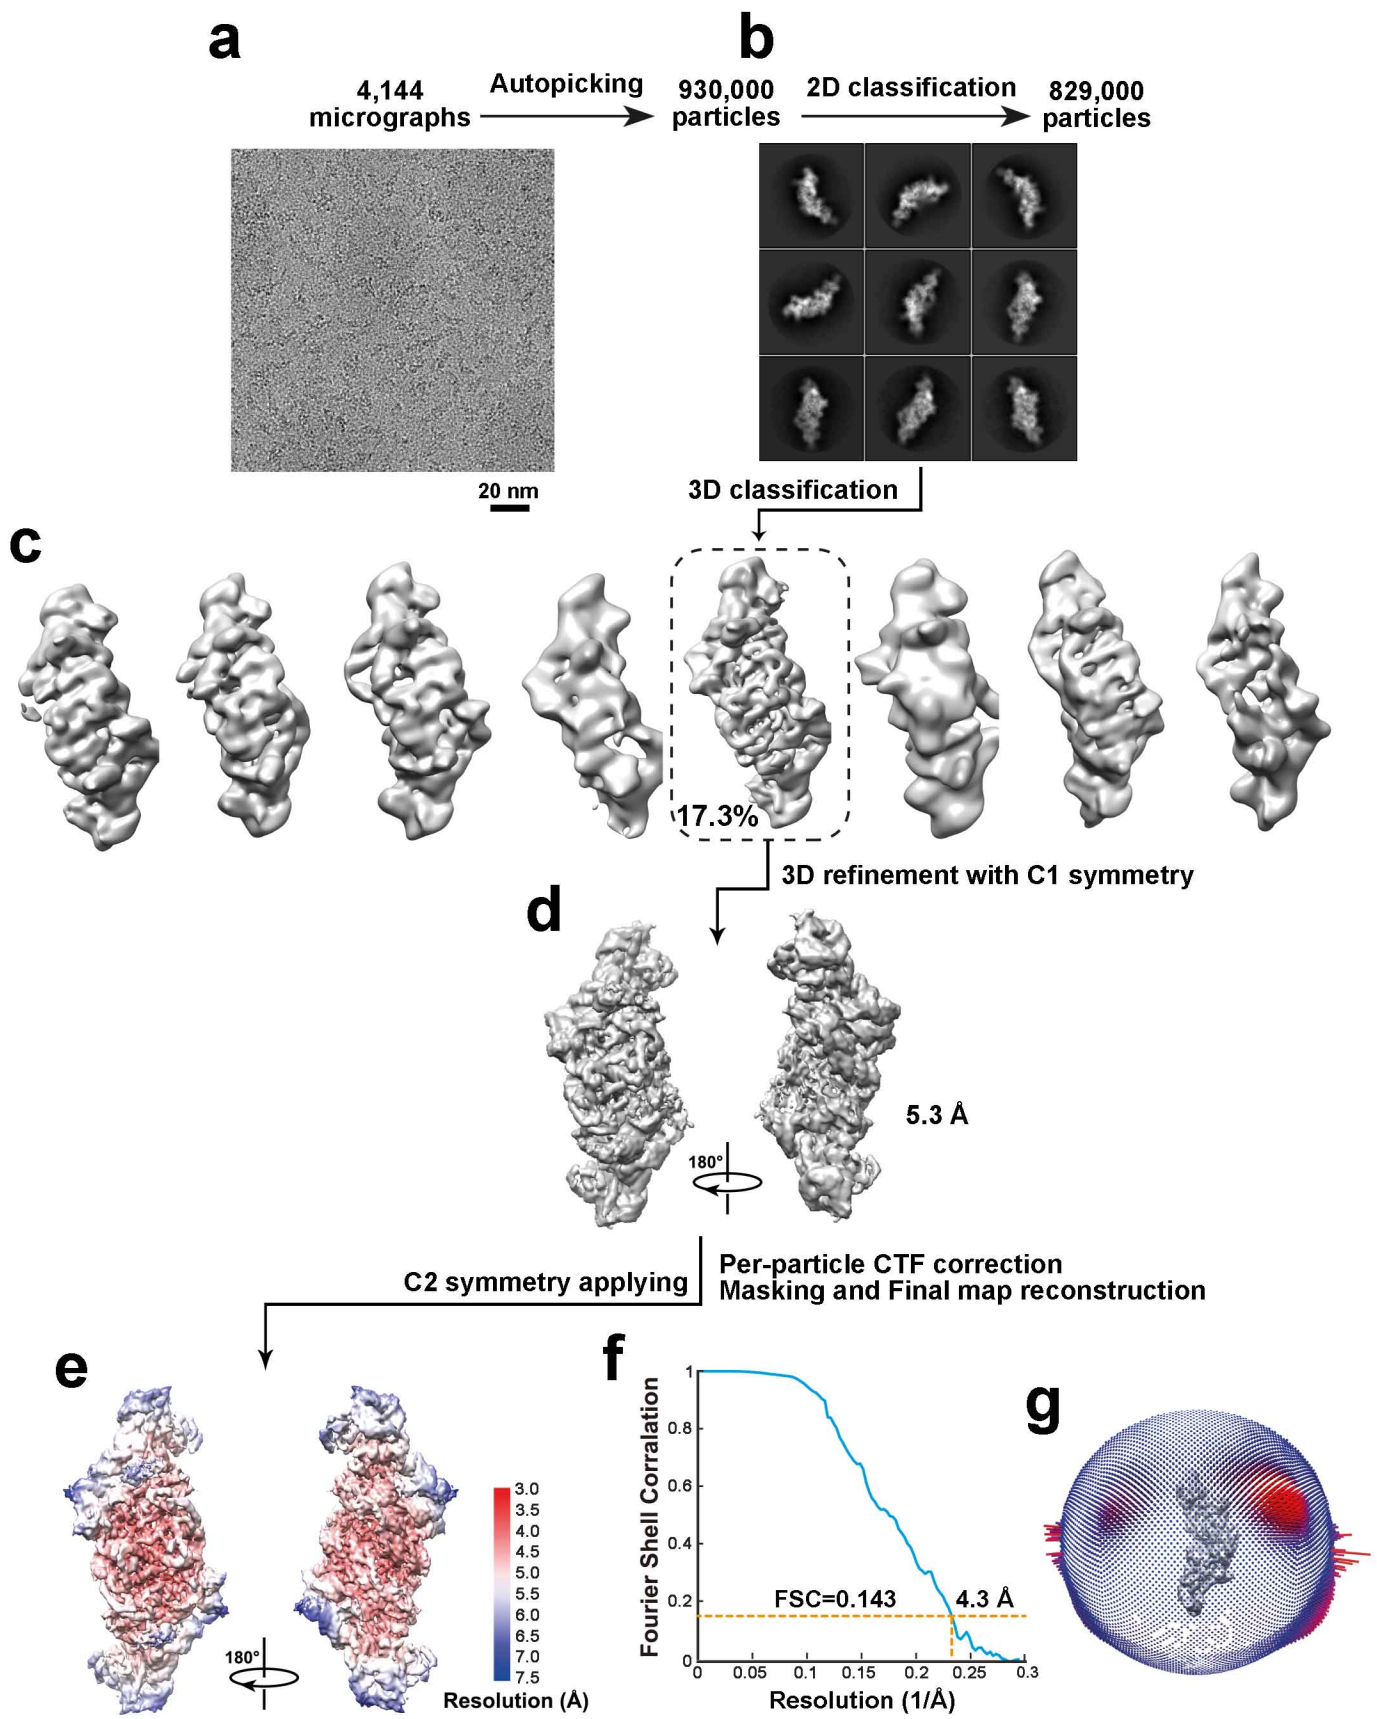

Supplementary Figure 4

**Supplementary Fig. 4** Cryo-EM analyses of *MjaRNase P* in complex with *E.coli* tRNA<sup>Tyr</sup>. **(a)** A representative cryo-EM micrograph of the *MjaRNase P*-tRNA complex. **(b)** Selected reference-free 2D class averages of *MjaRNase P*-tRNA complex particles. **(c)** 3D classes of the cryo-EM particles used for *MjaRNase P*-tRNA complex construction. **(d)** 3D refinement of *MjaRNase P*-tRNA complex using C1 symmetry. **(e)** Local resolution map of the *MjaRNase P*-tRNA complex. C2 symmetry was applied in this round of 3D refinement to improve the resolution. **(f)** Gold standard FSC curve of the final reconstructed EM map of *MjaRNase P*-tRNA complex. **(g)** Angular distribution of the particles used for the final reconstruction of the *MjaRNase P*-tRNA complex.



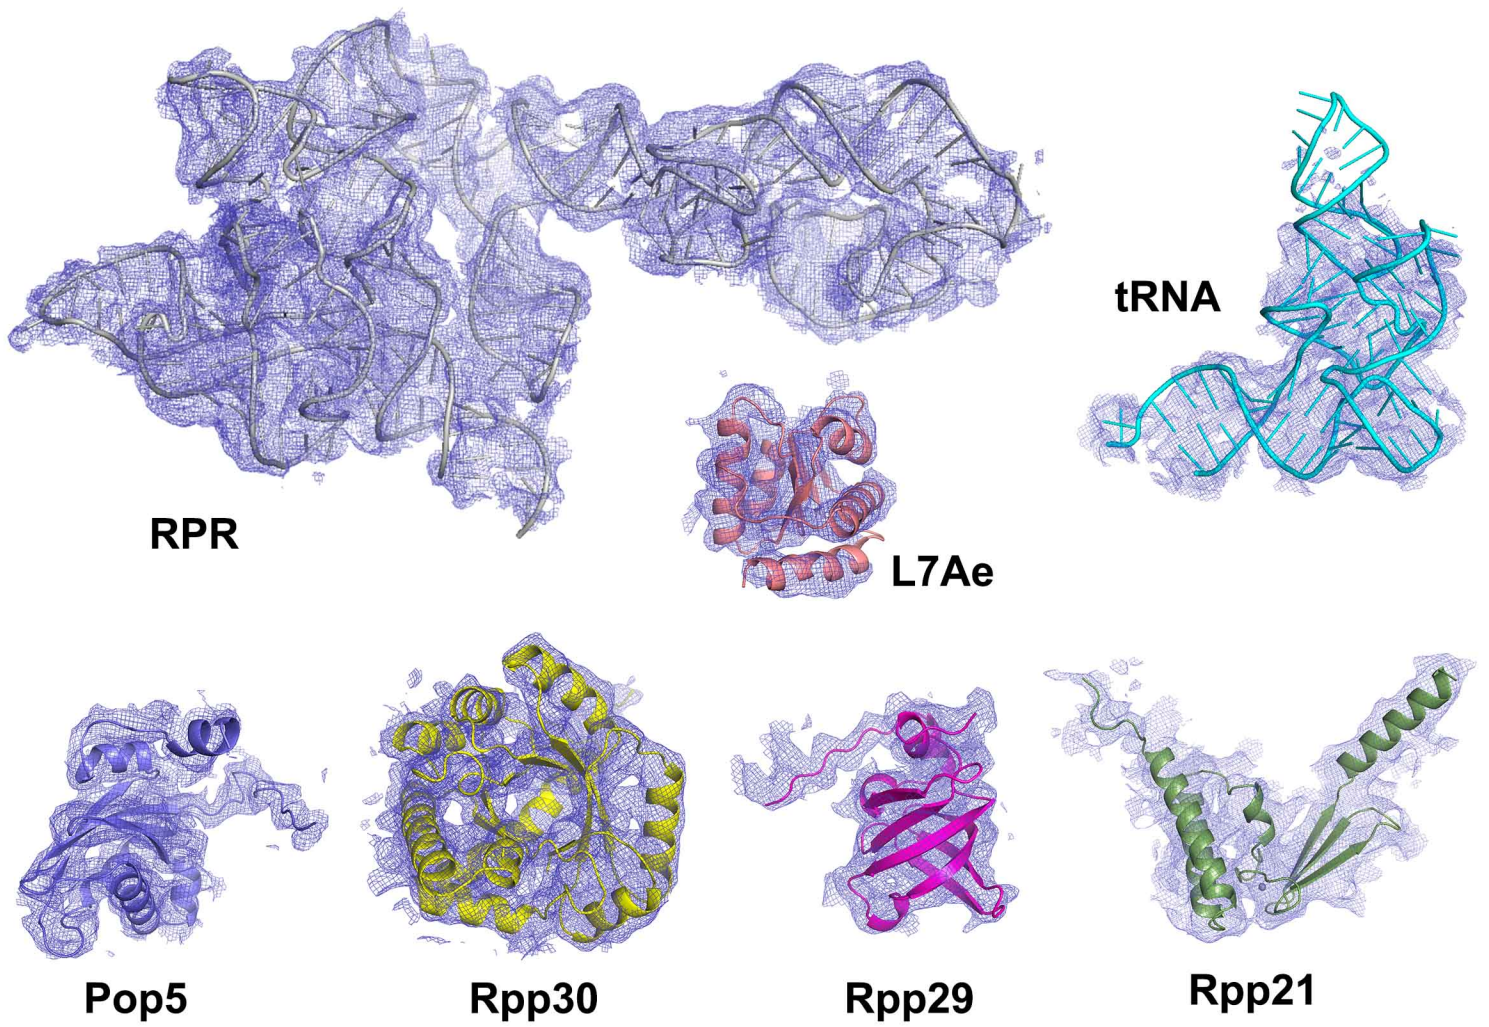

**Supplementary Figure 5**

**Supplementary Fig. 5** Cryo-EM density maps of individual protein and RNA subunits in the *Mja*RNase P-pre-tRNA<sup>Tyr</sup> complex. Cartoons of each structure are fit into the EM density map and colored as in Fig. 2a.

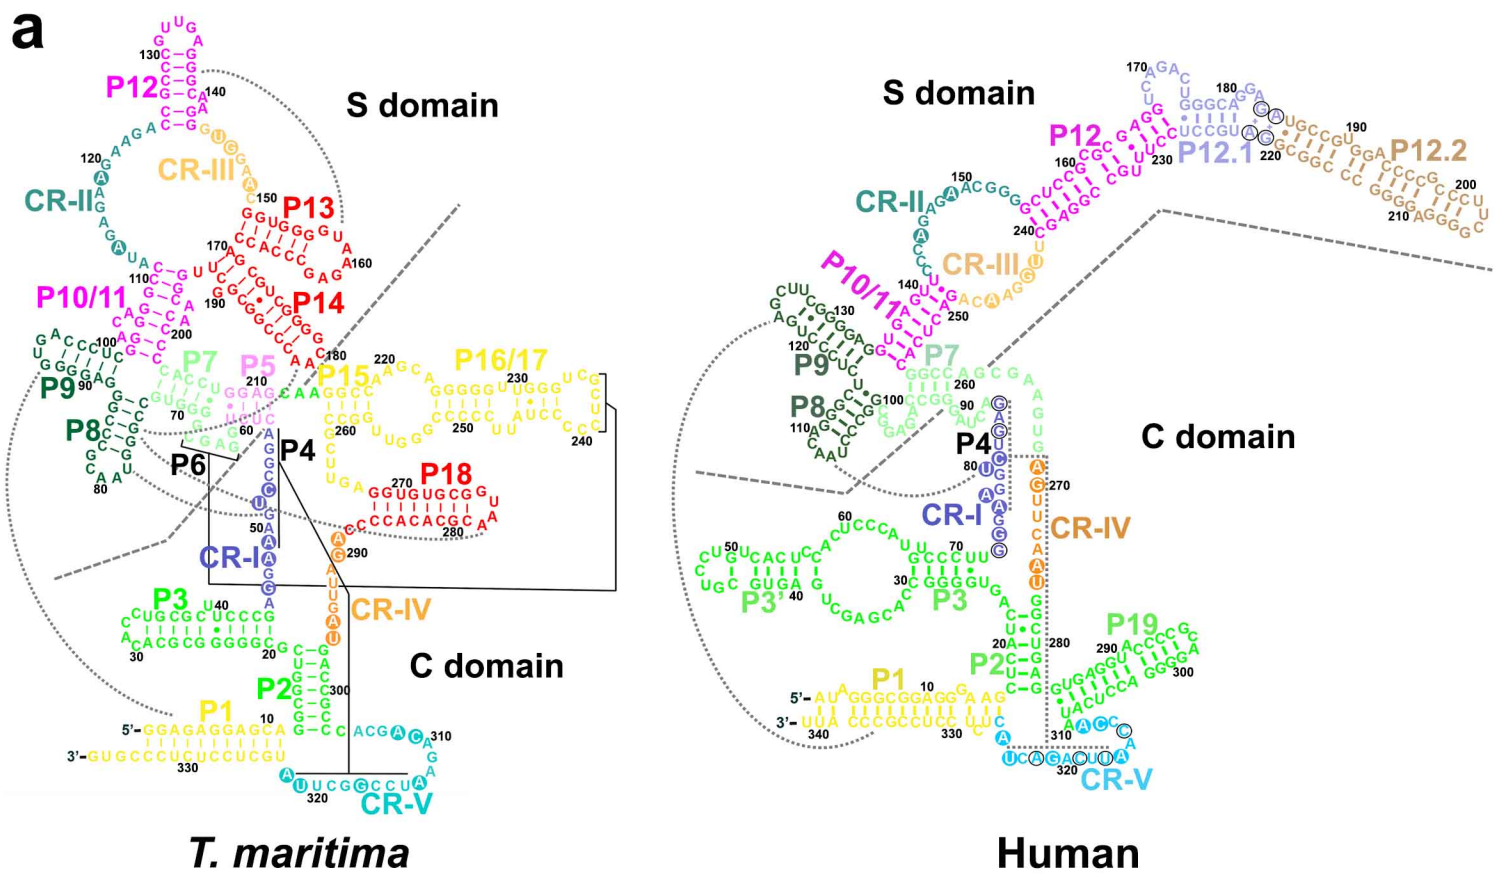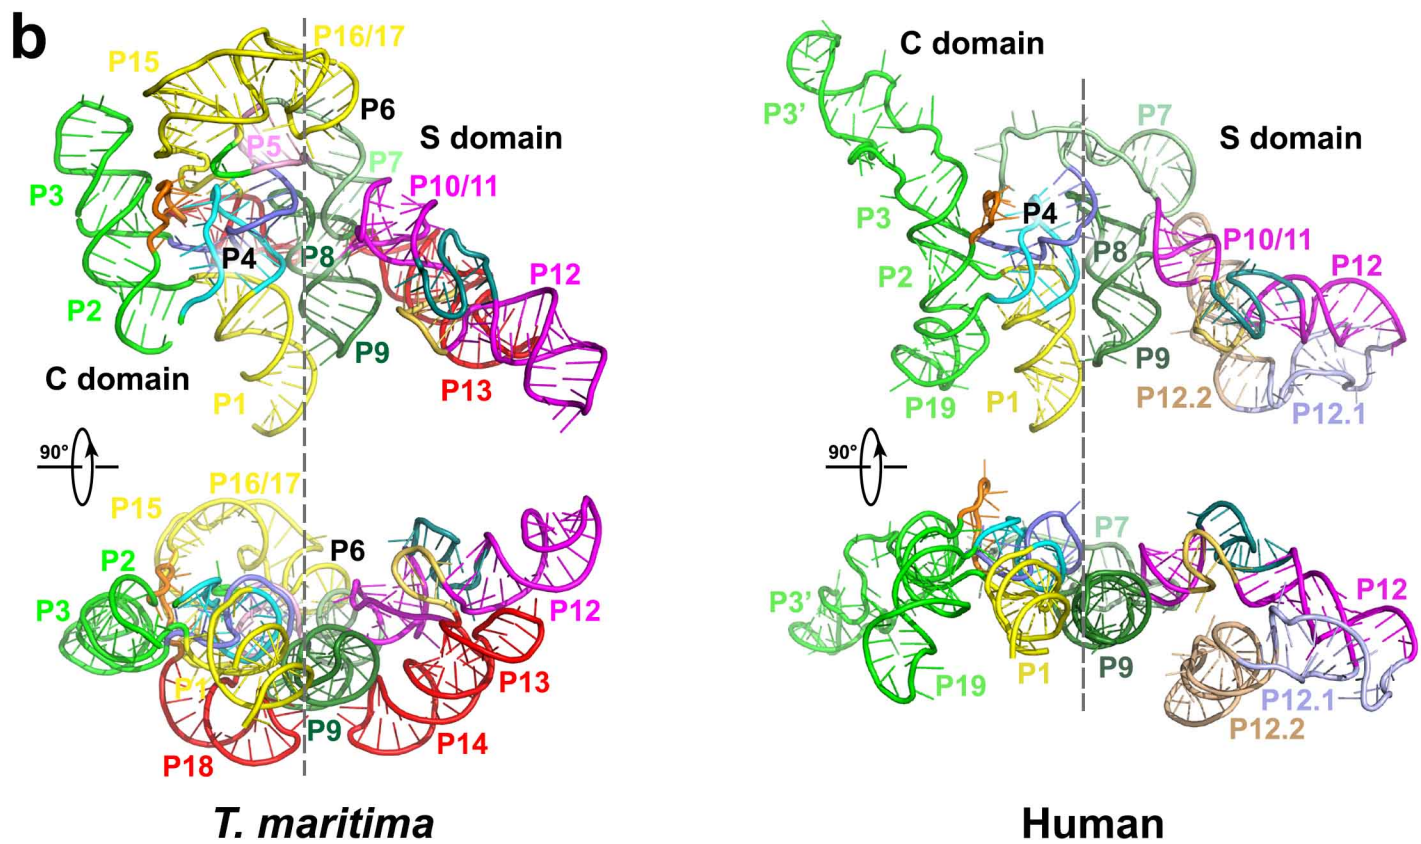

**Supplementary Figure 6**



**Supplementary Fig. 6** RPR structures of *T. maritima* and human RNase P. **(a)** Secondary structures of *T. maritima* (left) and human (right) RNase P RPR. RNA stems are colored as in Fig. 3a. **(b)** Two orthogonal views of the overall structure of *T. maritima* (left) and human (right) RPR.

## M type

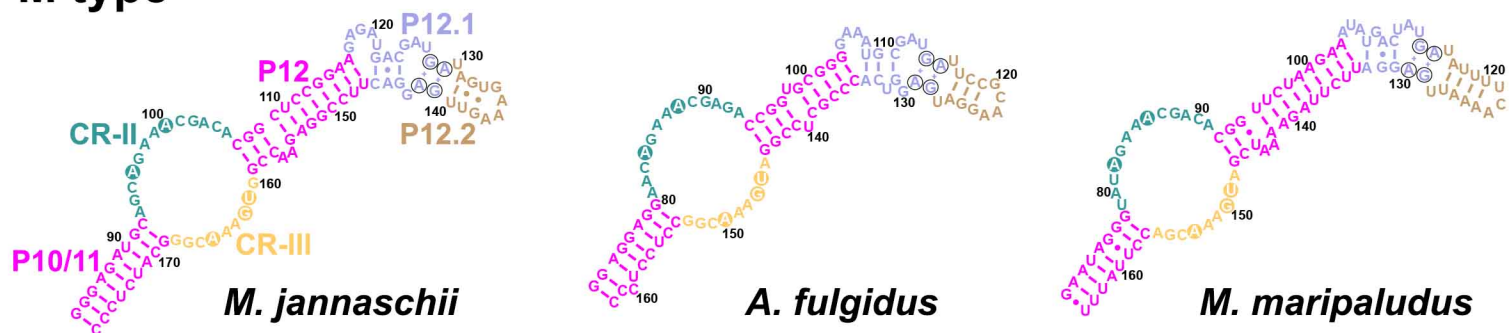

## A type

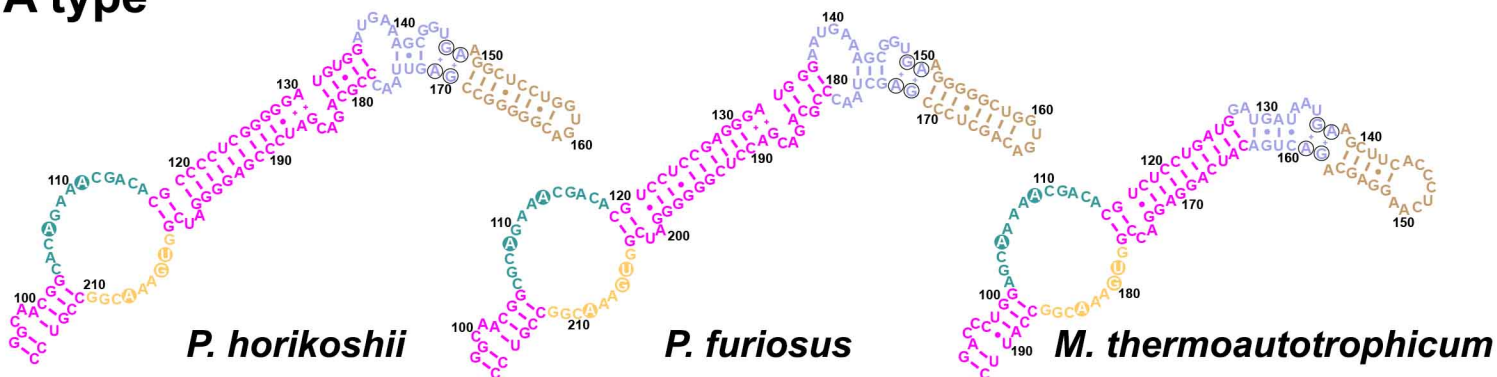

Supplementary Figure 7

**Supplementary Fig. 7** Secondary structural models of the conserved K-turn in the S domain of RPR in representative archaeal organisms. The conserved regions are colored as in Fig. 3a. The conserved K-turn nucleotides are highlighted with open circles.

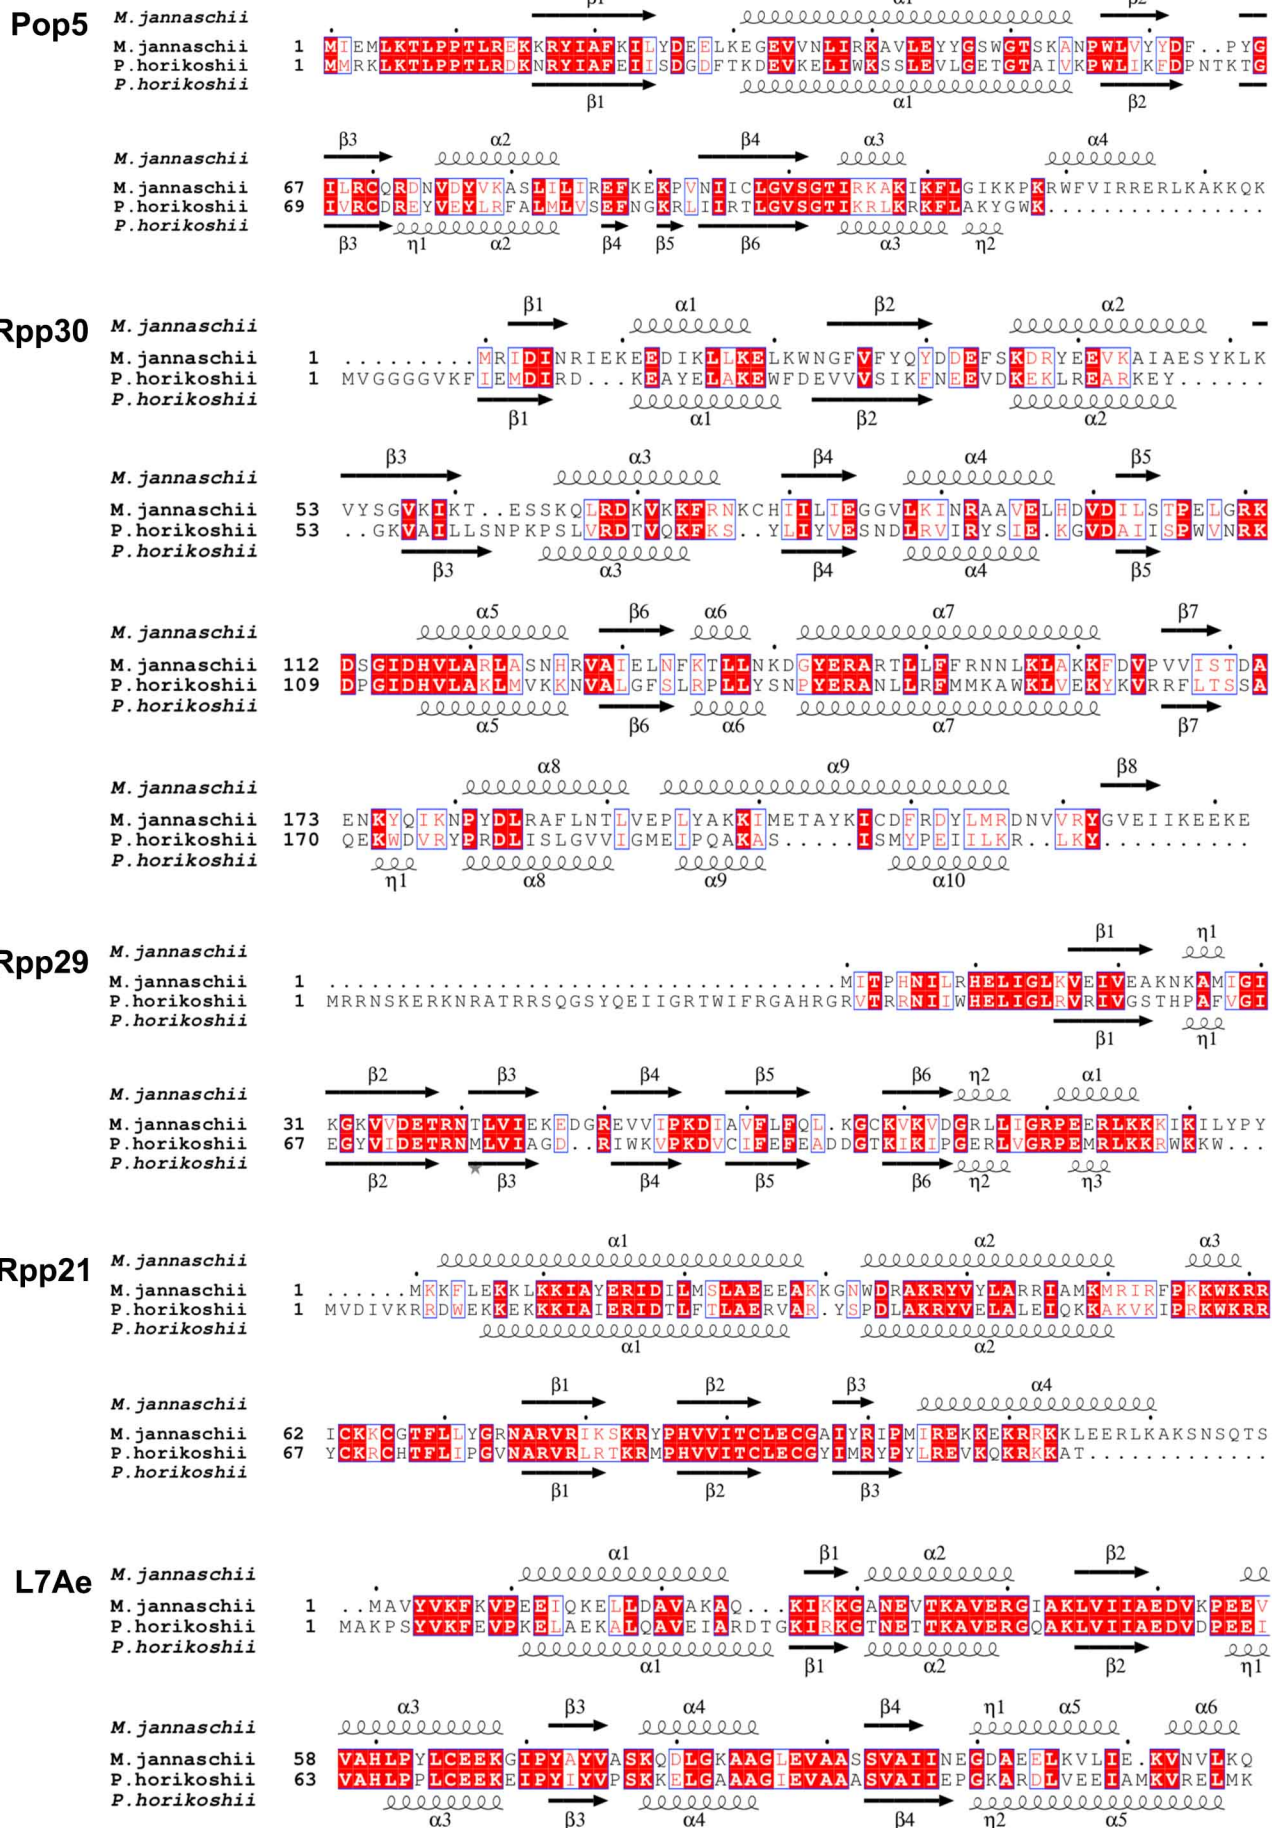

**Supplementary Figure 8**

**Supplementary Fig. 8** Sequence alignment of RNase P RPRs of *M. jannaschii* and *P. horikoshii*. Conserved residues are colored in red. Secondary structural elements were assigned based on the cryo-EM structure of *Mja*RNase P reported in this study and the crystal structures of *P. horikoshii* RNase P protein components.



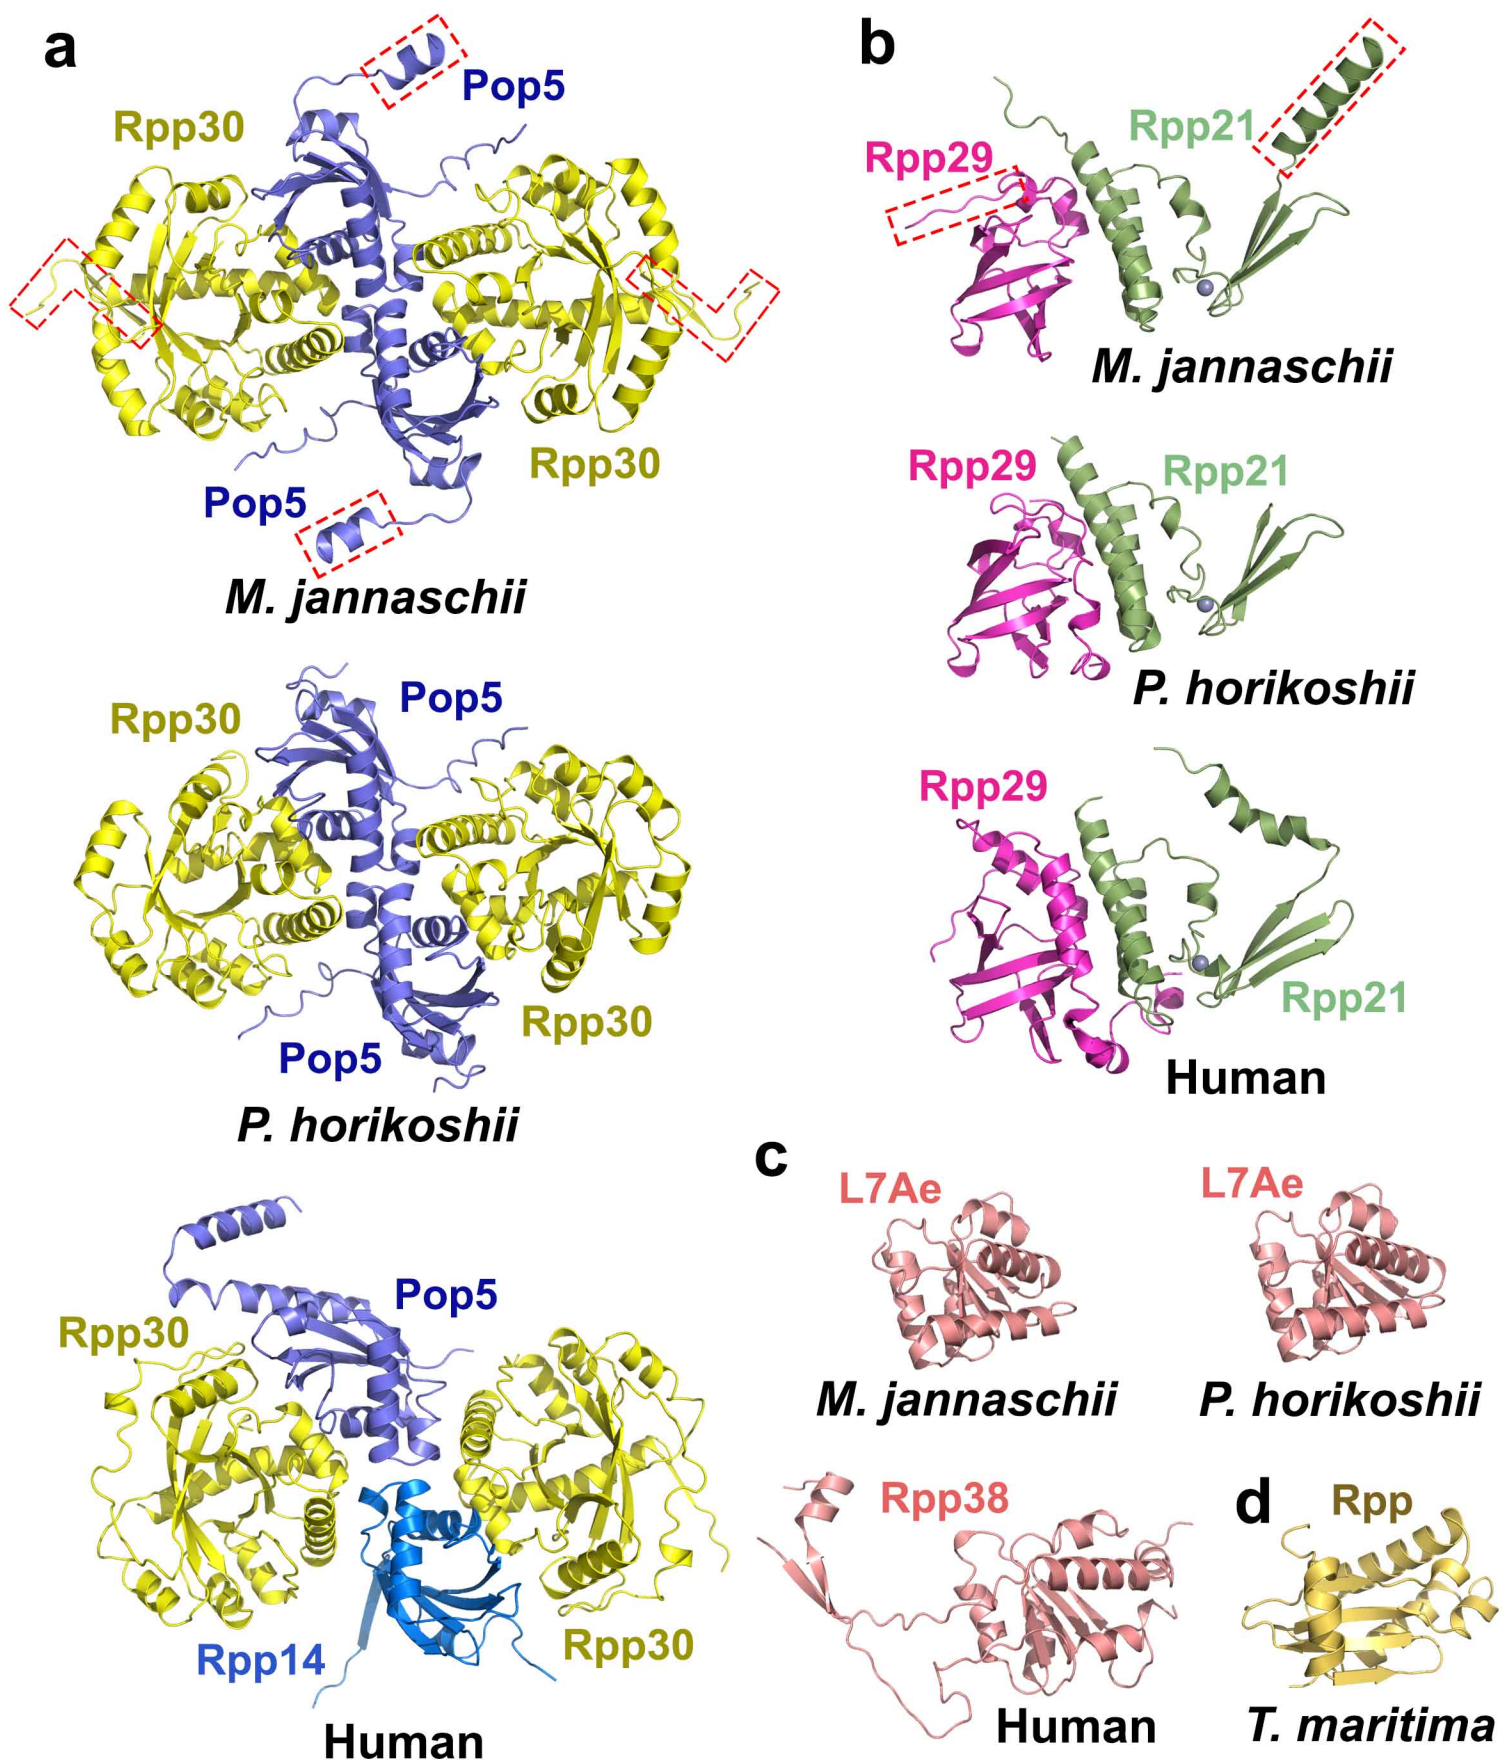

**Supplementary Figure 9**

**Supplementary Fig. 9** Structure comparison of RNase P protein components. **(a)** Cartoon representation of *M. jannaschii* (Pop5-Rpp30)<sub>2</sub> (top), *P. horikoshii* (Pop5-Rpp30)<sub>2</sub> (middle) and human Pop5-(Rpp30)<sub>2</sub>-Rpp14 (bottom). Extra structural elements of *M. jannaschii* Pop5 and Rpp30 compared with their *P. horikoshii* counterparts are highlighted by dashed red boxes. **(b)** Cartoon representation of *M. jannaschii* Rpp29-Rpp21 (top), *P. horikoshii* Rpp29-Rpp21 (middle), and human Rpp29-Rpp21 (bottom). Extra structural elements of *M. jannaschii* Rpp21 and Rpp29 compared with their *P. horikoshii* counterparts are highlighted by dashed red boxes. **(c)** Structure comparison of *M. jannaschii* L7Ae (left), *P. horikoshii* L7Ae (right) and human Rpp38 (bottom). **(d)** Cartoon representation of *T. maritima* Rpp.

**a**

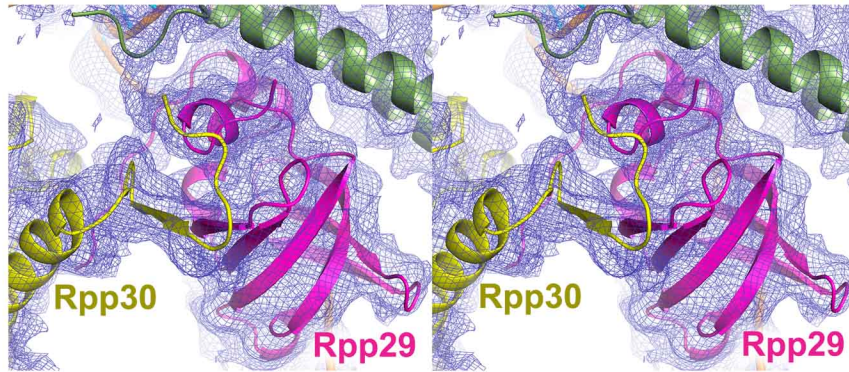

**b**

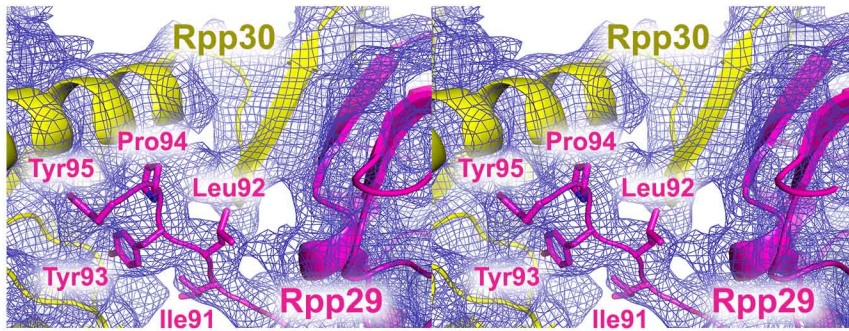

**Supplementary Figure 10**



**Supplementary Fig. 10** Stereo view of electron density maps of the interfaces between Rpp30 and Rpp29. **(a)** Close-up view of the electron density map of the interface between the Rpp30 C terminal  $\beta$  strand and the  $\beta$  barrel of Rpp29. **(b)** Close-up view of the electron density map of the interface between the C-terminal tail of Rpp29 and the hydrophobic groove of Rpp30.

# Rpp30

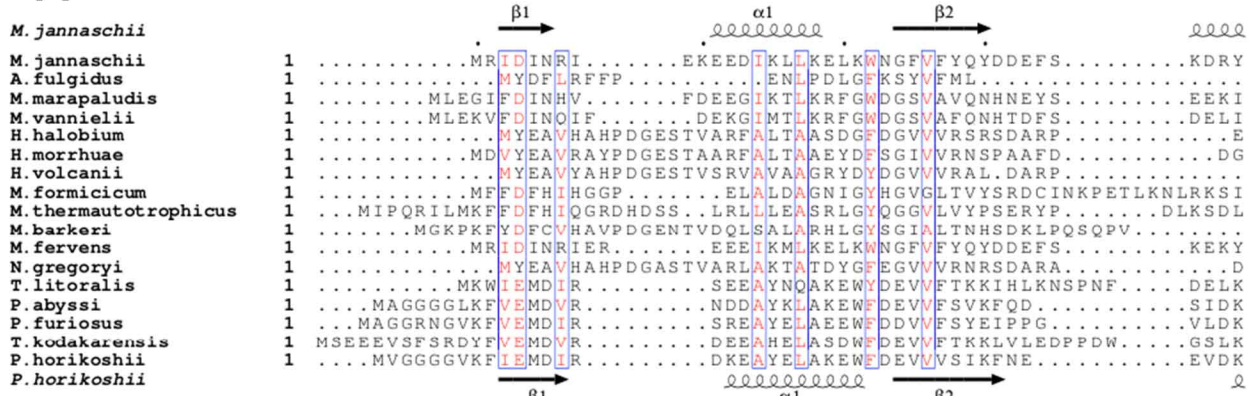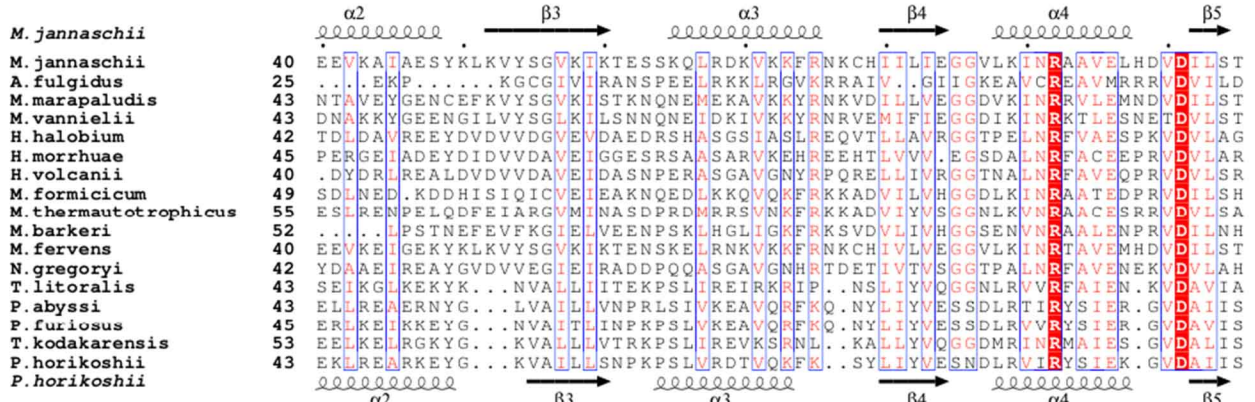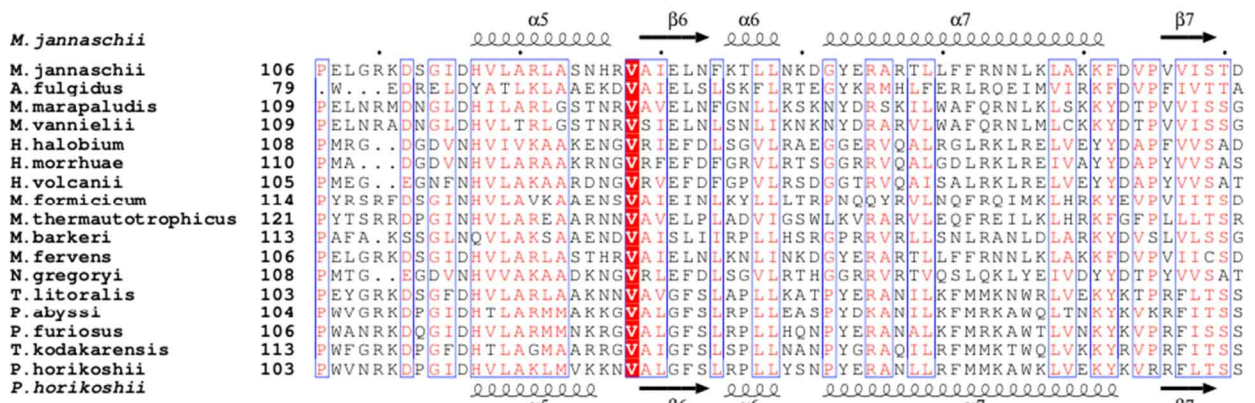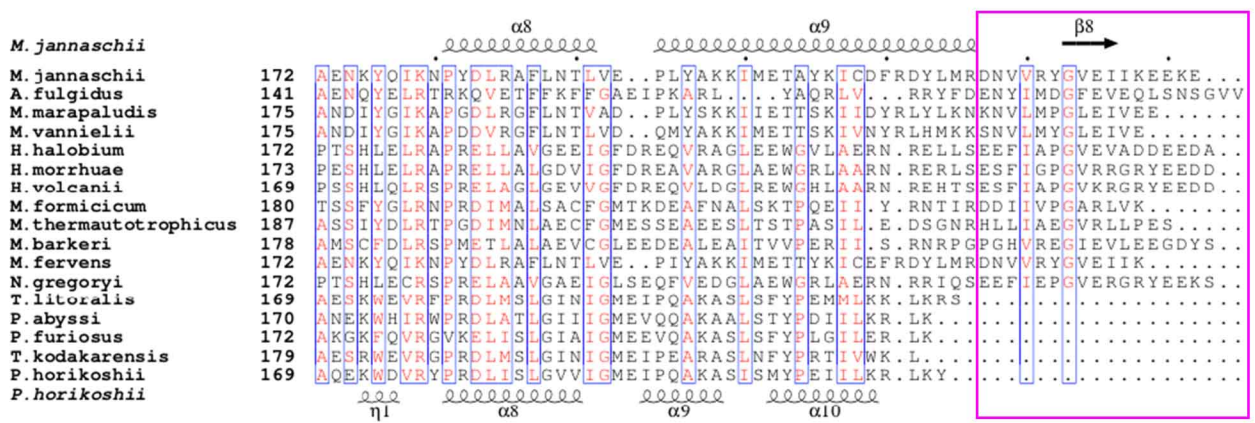

Supplementary Figure 11

**Supplementary Fig. 11** Multiple sequence alignment of Rpp30 of A-type and M-type RNase Ps. Sequences of RNase P protein component Rpp30 from 17 representative type-A and type-M archaea including *M. jannaschii* and *P. horikoshii* were aligned. Conserved residues are colored in red. The C-terminal regions of Rpp30 were highlighted with a magenta box. Secondary structure elements were assigned based on the cryo-EM structure of *Mja*RNase P reported in this study and the crystal structures of *P. horikoshii* RNase P protein components.

**a**

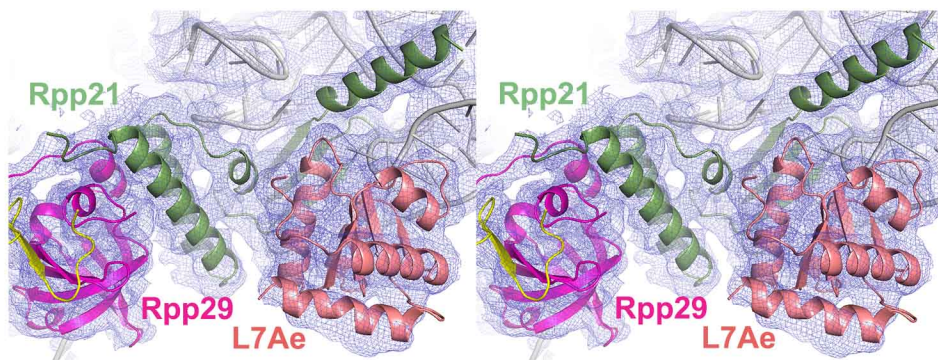

**b**

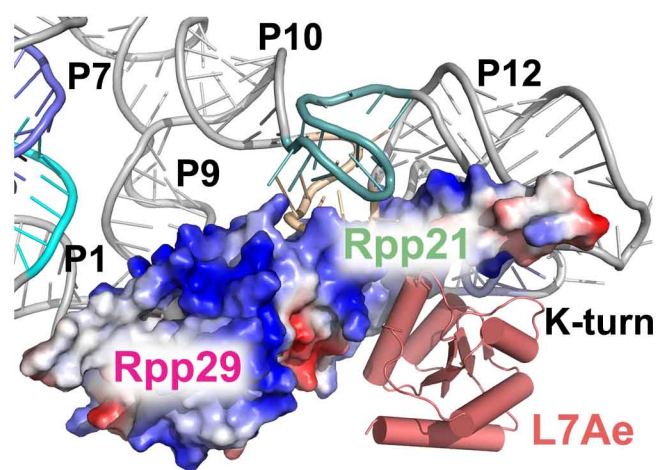

**c**

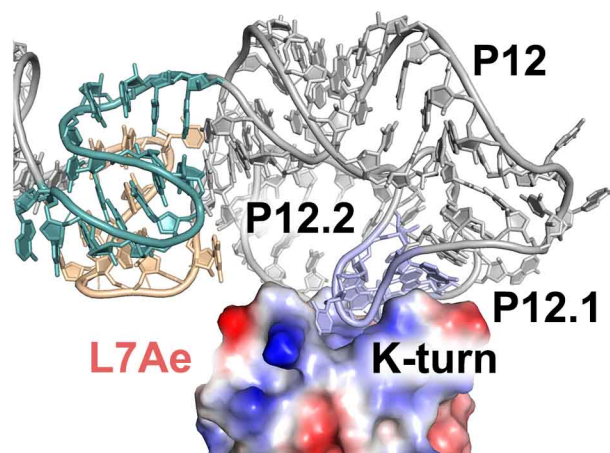

**Supplementary Figure 12**

**Supplementary Fig. 12** Interaction between the Rpp29-Rpp21-L7Ae heterotrimer and RPR. **(a)** Stereo view of the electron density map of the interface between Rpp29-Rpp21-L7Ae and RPR. **(b)** Close-up view of the interface between Rpp29-Rpp21 and the S domain of RPR. **(c)** Close-up view of interface between L7Ae and the K-turn of RPR.



**a**

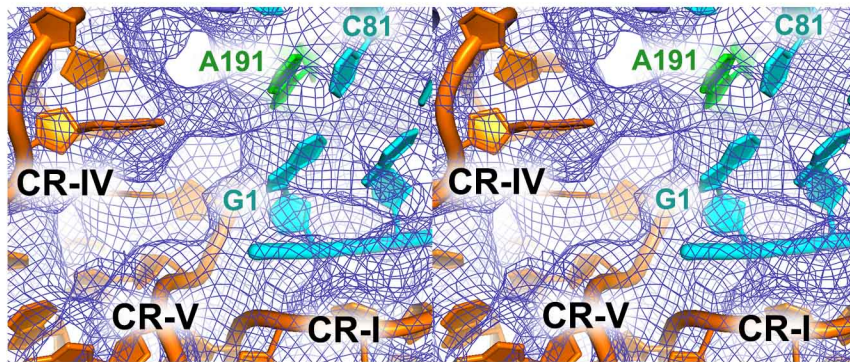

**b**

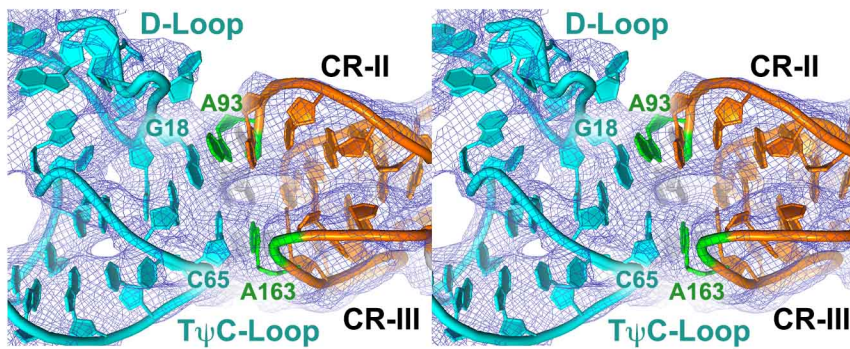

**c**

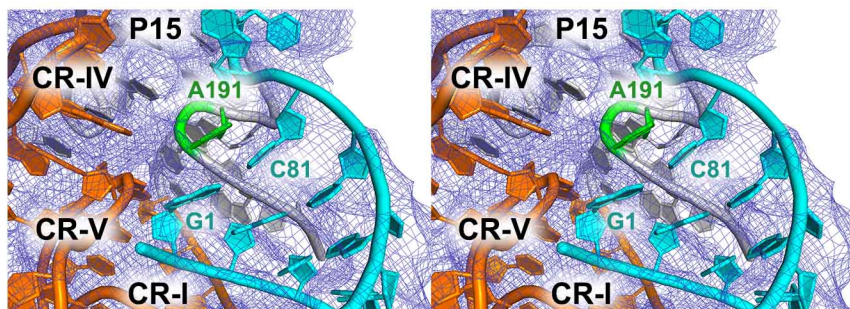

**Supplementary Figure 13**

**Supplementary Fig. 13** Stereo views of the electron density map of the interactions between RPR and tRNA. **(a)** Close-up view of the 5' end of tRNA. CR-I, CR-IV and CR-V of RPR are colored in orange. **(b)** Close-up view of the electron density map of the interface between the T $\psi$ C and D loops of tRNA and the T-loop anchor in CR-II and CR-III of RPR. **(c)** Stereo view of the electron density map of the central nucleotide A191 (in green) in loop L<sub>5-15</sub> of RPR and the first base pair G1-C81 of tRNA.

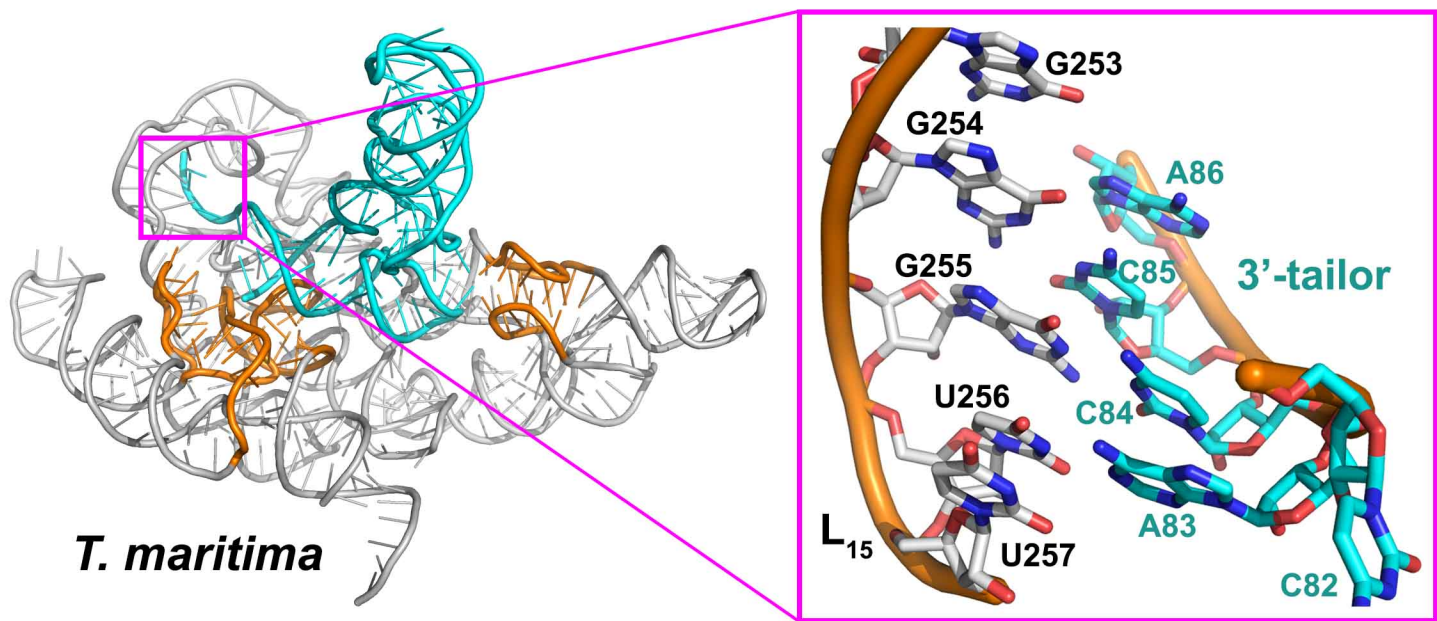

**Supplementary Figure 14**



**Supplementary Fig. 14** Interaction between the 3'-RCCA tail of tRNA and loop L<sub>15</sub> of *T. maritima* RNase P. Left: Overall view of the interaction between tRNA and *T. maritima* RNase P. Right: Close-up view of the 3'-RCCA tail recognized by base pairing interactions with loop L<sub>15</sub> of *T. maritima* RNase P.

| A type               |           |                     |           | M type               |           |                    |           | P type               |           |
|----------------------|-----------|---------------------|-----------|----------------------|-----------|--------------------|-----------|----------------------|-----------|
| <i>P. horikoshii</i> |           | <i>H. hispanica</i> |           | <i>M. jannaschii</i> |           | <i>A. fulgidus</i> |           | <i>P. aerophilum</i> |           |
| tRNA                 | Sequence  | tRNA                | Sequence  | tRNA                 | Sequence  | tRNA               | Sequence  | tRNA                 | Sequence  |
| Ala                  | ACCA CATA | Ala                 | ACTC CTGT | Ala                  | ACCA TTTT | Ala                | ATGT TTTT | Ala                  | ACCA GCCC |
| Ala                  | ACCA CAAA | Ala                 | ATCC TTCT | Ala                  | ACTA TATA | Ala                | ATGC CATA | Ala                  | ACTA TTTC |
| Ala                  | ACCA CGAA | Ala                 | ACTC CCGT | Arg                  | GTTA TTTT | Ala                | ATTA TTAC | Ala                  | ACCA CTTT |
| Arg                  | GCCA TCAC | Arg                 | GTGT TCTG | Arg                  | CTCA TTTA | Arg                | GGTA TTTT | Arg                  | GCCA CTAT |
| Arg                  | GCCA GATT | Arg                 | GTGC AGCG | Arg                  | GCCA ATTT | Arg                | GCTT CTGT | Arg                  | GCCA TAAT |
| Arg                  | GCCA ACTC | Arg                 | GTTC TCAC | Asn                  | GCCA TTAA | Arg                | ATGG AATT | Asn                  | GCTG GACT |
| Arg                  | GCCA ACAA | Arg                 | ACTC GATT | Asp                  | GCCA TTTG | Arg                | GTCA GAAA | Asp                  | GCCA ACCC |
| Arg                  | GCCA ACGT | Arg                 | GTGG CGTC | Cys                  | TCCA TTTG | Arg                | GCTC CAAT | Gln                  | ACTT CCGC |
| Asn                  | GCCA AAGA | Asn                 | GTCA CTTC | Gln                  | ACCA TTTT | Asn                | GTAT TGTC | Gln                  | ACCA ATTC |
| Asp                  | GCCA TAAT | Asp                 | GCTT TCTC | Glu                  | ATCA TTCG | Asp                | GCTC TCAT | Glu                  | ATGA AACA |
| Cys                  | TCCA AACT | Cys                 | TTTT CAGC | Gly                  | ACCA CTGG | Cys                | TCTC TTTA | Gly                  | ATTG GTCT |
| Gln                  | ACCA TTGC | Gln                 | ACTT CTGG | Gly                  | ACCA TAAT | Gln                | ATCT GTTT | Gly                  | ACCA CGTT |
| Gln                  | ACCA AAAA | Gln                 | ACTC ACCG | His                  | CCTT TTTT | Gln                | ATGT CTAA | Gly                  | ATGT CCGC |
| Glu                  | ACCA TGTG | Glu                 | ATTC CAAC | Ile                  | ACCA TATT | Glu                | ACTG CTTT | His                  | CCCA CGTC |
| Glu                  | ACCA GGAA | Glu                 | ATTT CTTG | Leu                  | ACCA AATA | Glu                | ATTA TCCT | Ile                  | ACAT CAAG |
| Gly                  | ACCA TTAT | Gly                 | ATCC TTCA | Leu                  | ACCA TTTT | Gly                | ACTG TTTT | Ile                  | ACCT TGAC |
| Gly                  | ACCA CAAC | Gly                 | ATTT CTCA | Leu                  | ACCA TAGG | Gly                | ATAG CACT | Leu                  | ACCA CTTC |
| Gly                  | ACCA CAAT | Gly                 | ATTT CTGT | Lys                  | GCTA TTTC | Gly                | ACAT TGGT | Leu                  | ACCA CCTT |
| His                  | CCCA GAAA | His                 | CCTT TTCG | Met                  | ACTA TTTC | His                | CCTT TAAA | Leu                  | ACCA CCTC |
| Ile                  | ACCA GAAT | Ile                 | ACTA GCGG | Met                  | ACCA TATT | Ile                | ATTT TTAA | Leu                  | ACCA GTTT |
| Leu                  | ACCA TTTT | Leu                 | ATCG CCGG | Met                  | ACCA TTTT | Leu                | ATCA CTGA | Leu                  | ACCA CCTC |
| Leu                  | ACCA CTTA | Leu                 | ATTC GACT | Phe                  | ACCA TTGA | Leu                | ACTG AATT | Lys                  | GCTA CGAC |
| Leu                  | ACCA TGCT | Leu                 | ATCG CACT | Pro                  | ACCA TTTG | Leu                | ATTT AGTT | Lys                  | GCCA GTTA |
| Leu                  | ACCA ATTC | Leu                 | ACTC GTTT | Pro                  | ACCA CTTC | Leu                | ATGC TTTT | Met                  | ATTT TTAT |
| Leu                  | ACCA AAAT | Leu                 | ATAC CACT | Ser                  | GCTA TCTA | Leu                | ATGA TTTA | Met                  | ACTT TTTT |
| Lys                  | GCCA GCCT | Lys                 | GCTT TCTG | Ser                  | GCCA CTTC | Lys                | GCTG TTTG | Phe                  | ACCA TCGC |
| Lys                  | GCCA AGTT | Lys                 | GTTC GACC | Ser                  | GCCA ATGA | Lys                | GTAT TTAA | Phro                 | ATTC TTAA |
| Met                  | ACCA TGCT | Met                 | ACTC CTCT | Thr                  | TCCA TTTG | Met                | ATTT GCCC | Phro                 | ATTT TATT |
| Met                  | ACCA GAAT | Met                 | ATCC ATTT | Thr                  | TCCA TTCT | Met                | ATGG TTGA | Phro                 | ATCT ACGT |
| Met                  | ACCA TACT | Met                 | ACTC CTGC | Trp                  | ACCA TTTT | Met                | ATCA GGAA | Ser                  | GCCT TTCC |
| Phe                  | ACCA GAAT | Phe                 | ATAT TCTG | Tyr                  | ACCA TCTC | Phe                | ATTT CTAT | Ser                  | GCCT TTTT |
| Pro                  | ACCA TTAA | Pro                 | ACTA CACA | Val                  | ACCA ATAA | Pro                | ACTT TAAA | Ser                  | GCTT TTCT |
| Pro                  | ACCA AAAT | Pro                 | ACTC AAAA | Val                  | ACCA TAAT | Pro                | ATCA TTGA | Ser                  | GCCA TATC |
| Pro                  | ACCA ATTT | Pro                 | ATAC TGTT | Val                  | ACTA TTTT | Pro                | ATCT GCTT | Trp                  | ACCA CTTG |
| Ser                  | GCCA CCTG | Ser                 | GCTT CTCG |                      |           | Ser                | GCTT ACCA | Tyr                  | ACTA GTCT |
| Ser                  | GCCA CACT | Ser                 | GCCT TTCA |                      |           | Ser                | GCTG AAAC | Val                  | ACCT TTCC |
| Ser                  | GCCA ATCC | Ser                 | GTTT CTCG |                      |           | Ser                | GCTG TTGT | Val                  | ATTT AATT |
| Ser                  | GCCA GAAT | Ser                 | GCTT CTCG |                      |           | Ser                | GCTG GGGG |                      |           |
| Thr                  | TCCA ACAA | Thr                 | TTCA GGAA |                      |           | Thr                | TTTC CTGA |                      |           |
| Thr                  | TCCA TTCT | Thr                 | TTTT CTG  |                      |           | Thr                | TTGC AATA |                      |           |
| Thr                  | TCCA GCGG | Thr                 | TTGA TACC |                      |           | Thr                | TTGC TTTA |                      |           |
| Trp                  | ACCA AGTT | Trp                 | ATAC CCTT |                      |           | Trp                | ATTT TTAT |                      |           |
| Tyr                  | ACCA CCAG | Tyr                 | ATTT CCTC |                      |           | Tyr                | ACTT GAAT |                      |           |
| Val                  | ACCA TTTC | Val                 | ATTA CTTC |                      |           | Val                | ATTT TTCT |                      |           |
| Val                  | ACCA GATT | Val                 | ATTC ACGC |                      |           | Val                | ATTT ATTT |                      |           |
| Val                  | ACCA TCGT | Val                 | ACTC ACGT |                      |           | Val                | ATTT TTGT |                      |           |

Supplementary Figure 15

**Supplementary Fig. 15** 3' terminal sequences of tRNAs from representative A-type, M-type and P-type archaea. All of *P. horikoshii* tRNA genes contain the 3'-RCCA sequence. Some *M. jannaschii* and *Pyrobaculum aerophilum* tRNAs do not contain the 3'-RCCA sequence. The 3'-RCCA sequence is highlighted in red.

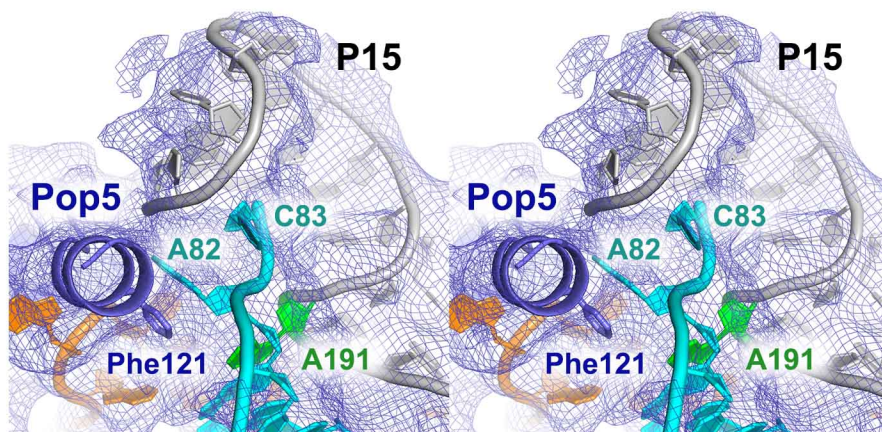

**Supplementary Figure 16**

**Supplementary Fig. 16** Stereo view of the electron density map of the 3' termini of the tRNA substrate. The tRNA is colored in cyan, RPR in gray and Pop5 in slate.

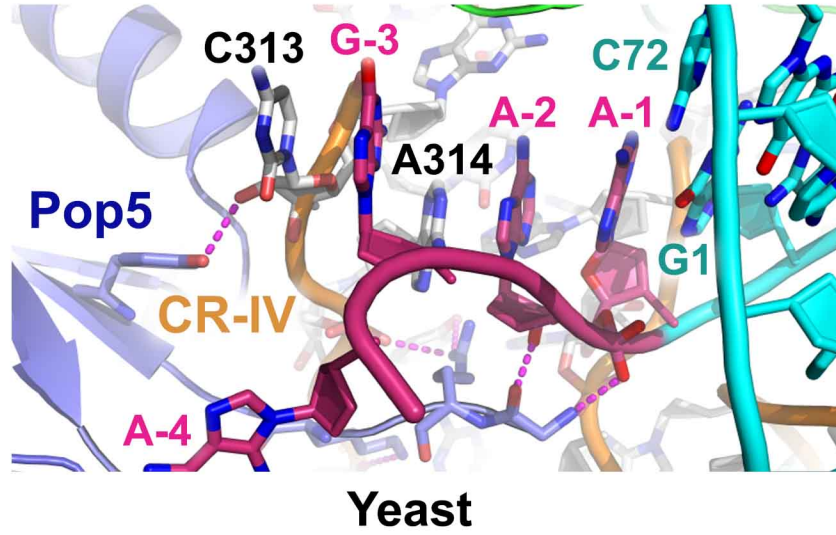

**Supplementary Figure 17**

**Supplementary Fig. 17** A close-up view of the interaction between the 5'-leader and RNase P in yeast RNase P-tRNA complex structure. Four nucleotides (A-1, A-2, G-3 and A-4) in the 5'-leader are colored in warmpink. The rest of pre-tRNA and the conserved pseudoknot of Rpr1 RNA are shown in cartoon and colored in cyan and orange, respectively.

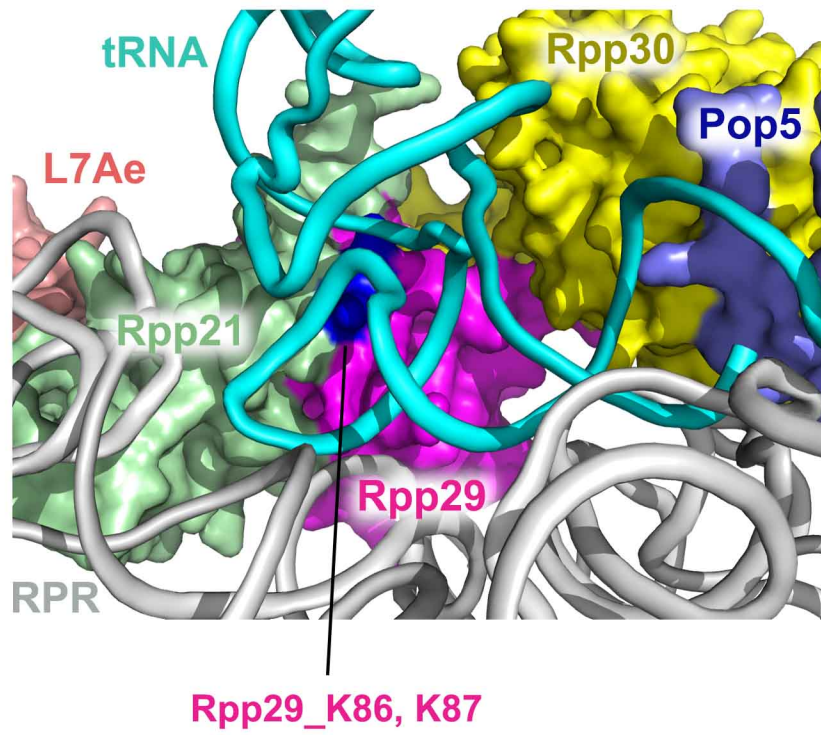

**Supplementary Figure 18**



**Supplementary Fig. 18** Overall view of the interface between the tRNA substrate and protein components Rpp30, Rpp29, and Rpp21. The RNA and protein components are shown in cartoon and surface representations, respectively. Alanine substitutions of *P. horikoshii* Rpp29 Lys121 and Lys122 (equivalent to *M. jannaschii* Rpp29 Lys86 and Lys87) highlighted in blue greatly reduced the enzymatic activity of archaeal RNase P.

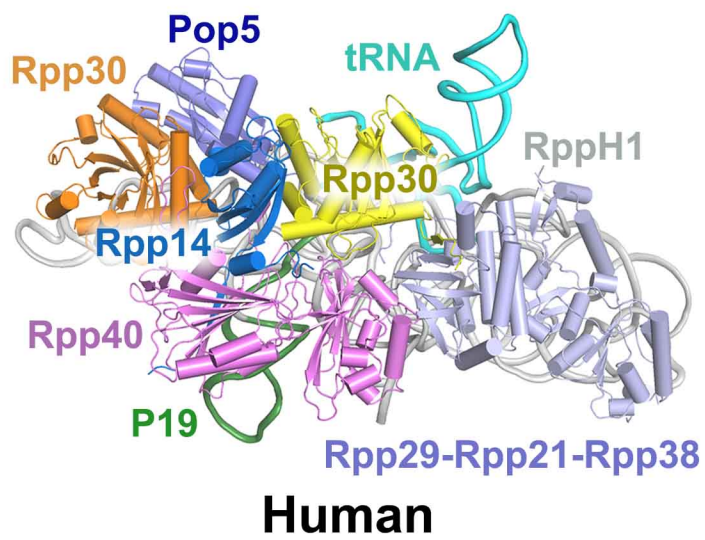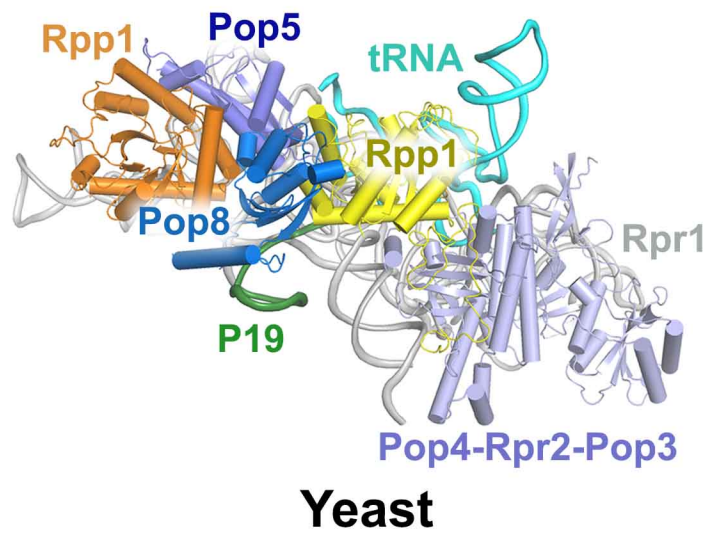

**Supplementary Figure 19**

**Supplementary Fig. 19** Human and yeast RNase P-tRNA complexes adopt a monomeric conformation. Left: In human RNase P-tRNA complex structure, Rpp30 is buttressed by Rpp40 and stem P19 of H1 RNA. Right: In yeast RNase P-tRNA complex, Rpp1 is buttressed by stems P1 and P19 of Rpr1 RNA.

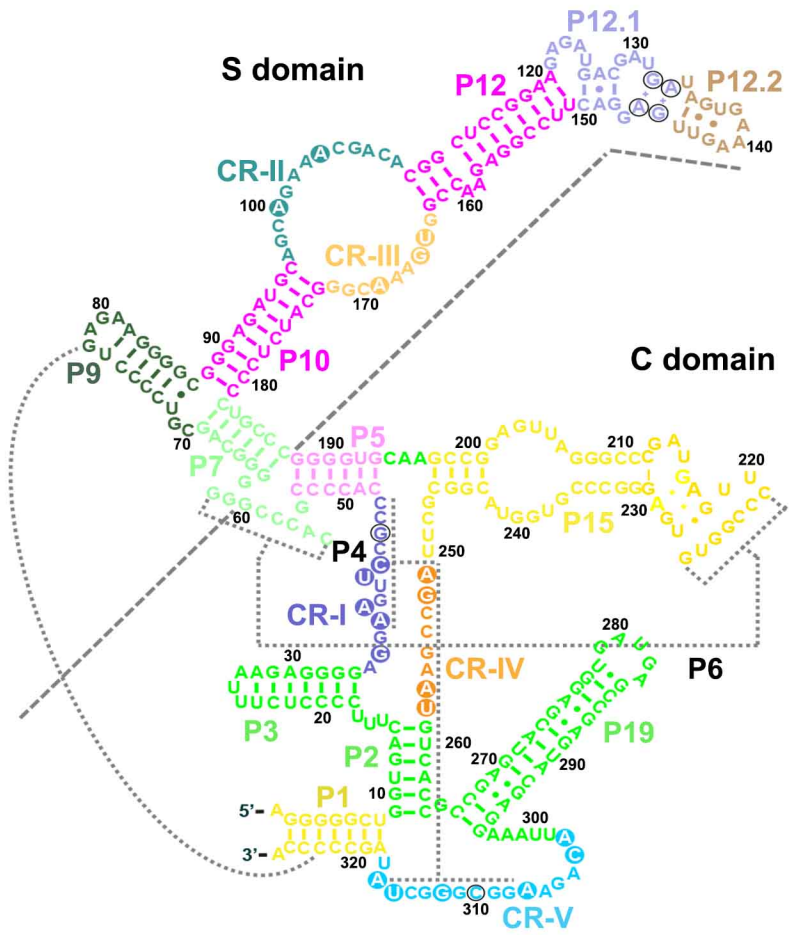

**Supplementary Figure 20**

**Supplementary Fig. 20** Secondary structure of the monomeric mutant RPR. Stems and the conserved regions are colored as in Fig. 3a. To make a monomeric mutant RPR, a P19 stem was inserted in the loop between stems P2 and P4. In addition, a short stem beyond P15 and a linker between stems P5 and P7 were engineered to form a type-A like structure.

Supplementary Table 1. Primary sequences of *M. jannaschii* tRNA genes

| tRNA | 5' leader                       | Core region                                                                             | 3' tail   |
|------|---------------------------------|-----------------------------------------------------------------------------------------|-----------|
| Ala  | TACCTAAACTTTGATGATTGATTGTTTTGT  | GGGCTGGTAGCTCAGACTGGGAGAGCGCCGATTGGCTGTGCGGAGGCCGCGGGTTCAAATCCC GCCAGTCC                | ACCA TTTT |
| Ala  | CCAGTCGTGGGCTTGCCCTCATAGGAAAAGT | GGGCCCGTAGCTCAGCTGGGAGAGCGCCGGCCTTGAAGCCGGAGGCCGTGGGTTCAAATCCCACCGGGTCC                 | ACTA TATA |
| Arg  | AATGGTTGAAATCATGGGATGTAATATAGA  | GCCCCGGTGCCTAGCCAGGATAGGGCGCTGGCCCTGCGGAGCCAGTTTTTTCAGGGGTTCAAATCCCCTCCGGGC             | GTTA TTTT |
| Arg  | AAATAAAAAACCATATAATAGCTTATTA    | GCCCTGGTGGTGTAGAGGATATCACGGGGGACTTCGGATCCCCAAACCCGGGTTCAAATCCC GCCAGGGC                 | CTCA TTTA |
| Arg  | TTAAAGAGTGCTTACAACCTGAGATAAAGA  | GGACCCGTAGCCTAGCCTGGATAGGGCACCGGCCCTTAAAGCCGGGGTTCGGGGTTCAAATCCCCTCGGGTCC               | GCCA ATTT |
| Asn  | TTCAAATCACCCCGCGGCACCATTGATGT   | GCCCCATAGCTCAGATGGTAGAGCGACGGACTGTTAATCCGTAGGTGCGAGGTTGAGTCTGCTGGGGGC                   | GCCA TTAA |
| Asp  | AATTCTCAAGGTAATCCTTGGCATTACTAT  | GCCCTGGTGGTGTAGCCCGGCATCATACGGGACTGTCACTCCGTGACTCGGGTTCAAATCCC GCCAGGGC                 | GCCA TTTG |
| Cys  | TTATGTATGCAACTCATAGGTTTTGAAAGA  | GCCGGGGTAGCTAGGGGCTAGGCAGCGGACTGCAGATCCGCCTTACGTGGGTTCAAATCCCACCCCGGC                   | TCCA TTTG |
| Gln  | AGTATTTATTAATGCTTACGTTTGATGT    | AGCCCGGTGTGTAGTGGCCTATCATCCGGGGCTTTGGACCCGGGACCGGGTTCGAATCCGC GCCGGGCT                  | ACCA TTTT |
| Glu  | TCGGGCCACCATATTAATACTAATTA      | GCTCCGGTGTGTAGTCCGGCAATCATGCGGGCCTTTCGAGCCCGCACCCGGGTTCAAATCCC GCCGAGC                  | ATCA TTCG |
| Gly  | TCTGATGTGTTATGTTGCTTGCAATGGA    | GCGGCC TTGGTGTAGCCTGGTAACACACGGGCTGCCACGCCCGGACCCGGGTTCAAATCCC GCCAGCCGC                | ACCA CTGG |
| Gly  | TCTGATGTGTTATGTTGCTTGCAATGGA    | GCCCGGTGGTGTAGCCTGGTATCACTTGGCCTTCCAAGCCAGCACCCGGGTTCAAATCCC GCCGCGC                    | ACCA TAAT |
| His  | AATCCCTGCCCTGCACCATAGGTAAGTG    | GCCGGGTGGGGTAGTGGCCATCTGGGGGACTGTGGATCCCCTGACCCGGGTTCAAATCCC GCCCGGC                    | CCTT TTTT |
| Ile  | TATTATTAATTTTTGCTTCTGGTGGTGT    | AGGGCGGTGGCTCAGCTGGTTAGAGTGCTCGGCTGATAACCGAGTGGTCCGGGGTTCGAATCCC GCCCGCCT               | ACCA TATT |
| Leu  | GAGGTTTATAAATAAATTTGCCTTAAAG    | GCGGGGTGCCAAGCCAGGTCAAAGGCCAGATTGAGGGTCTGGTCCCGTAGGGGTTCCGGGGTTCAAATCCC GCCCCGC         | ACCA AATA |
| Leu  | AGTTCATCTATTCTATAATTCGCTTGC     | GCAGGGGTGCCAAGCC TGCCAAAGGCCGCCGACTTAAAGTCCGGTCCCGTAGGGGTTCCGGGGTTCAAATCCC GCCCTGC      | ACCA TTTT |
| Leu  | CTATTTTAAAGATAATTAAGAATATATGT   | GCAGGGGTGCCAAGCC TGCCAAAGGCCGCTGGGCTAGGACCCAGTCCCGTAGGGGTTCCAGGGTTCAAATCCC GCCCTGC      | ACCA TAGG |
| Lys  | TTGAAACGCGCACGAGCTAAGGGCTGAAGA  | GGGCCCGTAGCTCAGCTGGCAGAGCGCCTGGCTTTTAAACAGGTGGTTCGAGGGTTCAAATCCC TCGGGCCC               | GCTA TTTC |
| Met  | TTCGCTGTTTTGGATTAAGAGTTGAGTGA   | AGCGGGGTAGGGTAGCCAGGTCCATCCCGCCGGGCTCATAACCCGGAGATCGGAGTTCAAATCCC TCCCGGCT              | ACTA TTTC |
| Met  | ATTAATTTTTATTTTTTATACCAATAT     | GGGCCCGTAGCTCAGCTGGTGTAGAGCGCTCGGCTCATAACCGAGTGGTCAAGGGTTCAAATCCC TCGGGCCC              | ACCA TATT |
| Met  | TATGGGTTTGAATTATAATGATTTGCGT    | GCCGAGGTGGCTTAGCTGGTTATAGCGCCGGCTCATAACCCGGAGGTCGAGGGTTCAAATCCC TCCCTCGGC               | ACCA TTTT |
| Phe  | TGTAATGCATAATTATGCAACATTTGGGT   | GCCCGGTAGTTAGCCTGGGAGAACGCTGGACTGAAGATCCAGTTGTGCGGGTTCAAATCCC TCCCGGCGC                 | ACCA TTGA |
| Pro  | TAGATTTTAAACTTATTATTCTTTTAAAC   | GGGGCCGTGGGGTAGCCTGGATATCCTGTGCGCTTGGGGGCGTGCAGCCCGGGTTCAAAGTCCC TCGGGCCCC              | ACCA TTTG |
| Pro  | CCCCCCGGGGCTCCATTCTCTTTCAGT     | GGGCTGTGGGGTAGCCTGGTCTATCCTTTGGGATTTGGGATCCTGAGACCCAGTCAAATCTGGG CAGGCC                 | ACCA CTTC |
| Ser  | CCTTATACCAATTAGTGTGCTTTTATT     | GCGGGGTGGCCAGCCTGGTACGGCTGGGACTGCTAATCCATTGGGCAACGCCAGCCGGGTTCAAAGTCCC TGGCCCCGC        | GCTA TCTA |
| Ser  | GAATATATAAAAAATGAAACACGTTTCAGA  | GCGGAGGTAGCTAGCCCGGCCAAGGCGTGGGACTGGAGATCCATGGGGCTTGGCCCGGGGGTTCAAATCCC TCCCTCCGC       | GCCA CTTC |
| Ser  | ATCATTATATTTTCATATGCCTATTTGA    | GCAGGGGTAGCCAAGCCAGGACTACGGCGCTGGACTTGAGATCCAGTGGGGCTTGGCCCGCTGGGTTCAAATCCC TCCAGCCCTGC | GCCA ATGA |
| Thr  | TAAGATATAGTAATTAACATATGTAAGGT   | GCCTCGGTAGCTCAGCCTGGCGGAGCGCTGCTTGTAAGCAGGAGTTCGCGGGTTCAAACCCGCCGAGGC                   | TCCA TTTG |
| Thr  | ACATCTGTAATTAATACTGCAACGGA      | GCCTCGGTGGCTCAGCCTGGTAGAGCGCCTGACTTGAATCAGGTGGTTCGGGGTTCAAATCCC TCCCGGGGC               | TCCA TTCT |
| Trp  | TTTATTCTGTGAAGATTCTACATTGATGC   | GGGGGTGTGGTGTAGCCAGGTCTATCATCGGGGACTCCAGATCCCTGGACCTGGGTTCAAATCCC TCCAGCCCCC            | ACCA TTTT |
| Tyr  | TCAAATCTGGGCAGGCCACCACCTTCTGT   | CCGGCGGTAGTTAGCCTGGTAGAACGGCGGACTGTAGATCCGCATGTCGCTGGTCAAATCCC TCCGCCCGG                | ACCA TCTC |
| Val  | TATTCAAACATCAGTTAAACTTATTAGAT   | GGGCTCGTGGTCTAGTGGCTATGACGCCGCCCTCACAAGCGGTGGTTCGCGGGTTCAAATCCC TCCGAGCCC               | ACCA ATAA |
| Val  | TACACATACTTAATTTGCTTGTGGTTGA    | GGGCTCGTGGTCTAGATGGCTATGATGCCGCCCTGACACGGCGGTGGTTCGGGAGTTCAAATCCC TCCCGAGCCC            | ACCA TAAT |
| Val  | AGTTAAATTTTTATTGATGCTAAAGTTGA   | GGGCCATGGTCTAGCTGGCTATGACGTGCCCTTACAAGGCCAAGGTCGCGGGTTCAAATCCC TCCGGGCC                 | ACTA TTTT |



**Supplementary Table 2. Cryo-EM Data Collection and Refinement Statistics**

|                                           | <i>Mja</i> RNase P | <i>Mja</i> RNase P with tRNA |
|-------------------------------------------|--------------------|------------------------------|
| <b>Data collection</b>                    |                    |                              |
| EM equipment                              | FEI Titan Krios    | FEI Titan Krios              |
| Voltage (kV)                              | 300                | 300                          |
| Detector                                  | Falcon III         | Gatan K2                     |
| Pixel size (Å)                            | 1.09               | 1.32                         |
| Electron dose (e-/Å <sup>2</sup> )        | 50                 | 50                           |
| Defocus range (µm)                        | -1.5 ~ -2.5        | -1.5 ~ -2.5                  |
| <b>Reconstruction</b>                     |                    |                              |
| Software                                  | RELION 1.4 and 3.0 | RELION 1.4 and 2.1           |
| Number of used particles                  | 84,800             | 150,000                      |
| Symmetry imposed                          | C2                 | C2                           |
| Final resolution (Å)                      | 4.6                | 4.3                          |
| FSC threshold                             | 0.143              | 0.143                        |
| Map sharpening B-factor (Å <sup>2</sup> ) | -232               | -189                         |
| <b>Model building</b>                     |                    |                              |
| Software                                  | Coot 0.89          | Coot 0.89                    |
| <b>Refinement</b>                         |                    |                              |
| Software                                  | Phenix 1.14        | Phenix 1.14                  |
| Map CC                                    | 0.600              | 0.689                        |
| <b>Model composition</b>                  |                    |                              |
| Protein residues                          | 1,364              | 1,376                        |
| RNA nucleotides                           | 516                | 688                          |
| <b>Validation</b>                         |                    |                              |
| R.m.s deviations                          |                    |                              |
| Bond lengths (Å)                          | 0.003              | 0.003                        |
| Bond angles (°)                           | 0.699              | 0.722                        |
| Ramachandran plot (%)                     |                    |                              |
| Preferred region                          | 94.79              | 93.81                        |
| Allowed region                            | 5.21               | 6.19                         |
| Outlier region                            | 0.00               | 0.00                         |
| MolProbity score                          | 1.44               | 1.73                         |
| Clash score (all-atom)                    | 2.91               | 5.88                         |
| Rotamers outliers (%)                     | 0.83               | 0.66                         |

## Uncropped gels in Figure 1a

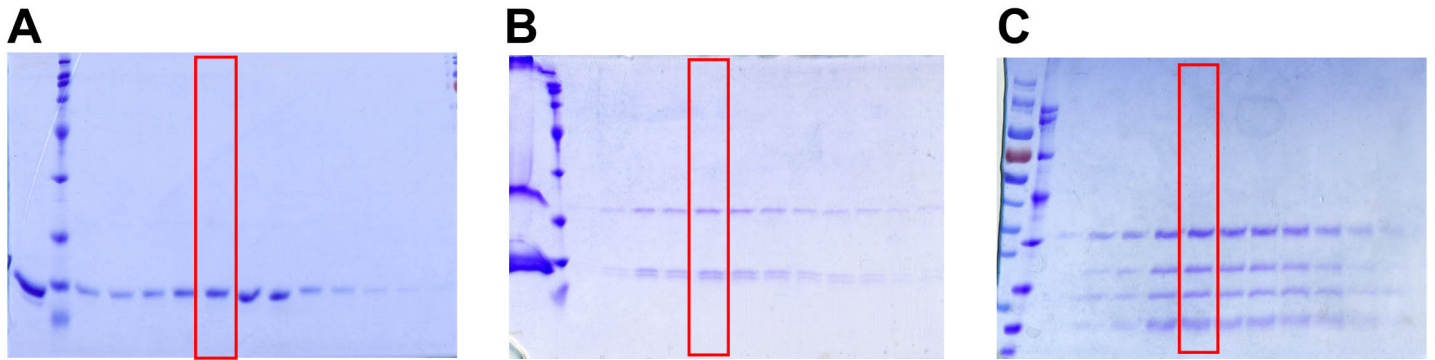

## Uncropped gel in Figure 8e

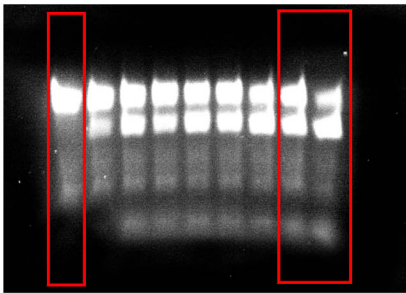

## Uncropped gels in Supplementary Fig. 1a

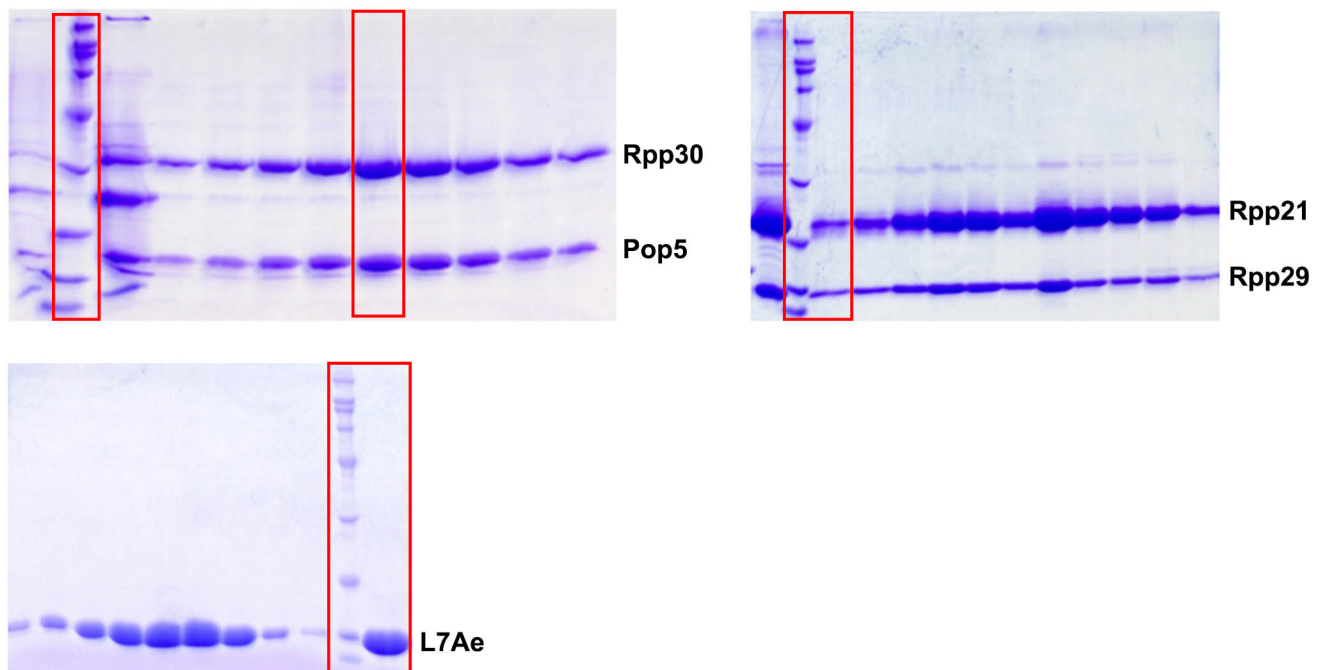

## Supplementary Data Set 1
